1 Gene clusters encoding putative outer membrane electron conduits have specific roles during  
2 metal and electrode respiration in *Geobacter sulfurreducens*.

3  
4  
5  
6

7 Fernanda Jiménez Otero<sup>a,b</sup>, Daniel R. Bond<sup>a,b,c</sup>

8  
9  
10  
11  
12  
13  
14  
15  
16  
17  
18  
19  
20  
21  
22

23 BioTechnology Institute<sup>a</sup>, Department of Biochemistry, Molecular Biology, and Biophysics<sup>b</sup>,  
24 Department of Plant and Microbial Biology<sup>c</sup> University of Minnesota-Twin Cities, Saint Paul MN  
25 55108

26  
27

28 **Short title: Electron transfer across the outer membrane of *G. sulfurreducens***

29  
30  
31  
32  
33  
34

35 **Send all correspondence to:**

36  
37 Daniel R. Bond  
38 140 Gortner Laboratory  
39 1479 Gortner Ave  
40 St. Paul, MN 55108  
41 dbond@umn.edu  
42

43 **Keywords:** *Geobacter*, extracellular electron transfer, multiheme cytochrome, porin cytochrome  
44 conduit

45 **SUMMARY**

46

47 At least five gene clusters in the *Geobacter sulfurreducens* genome encode putative outer  
48 membrane ‘electron conduits’, which are redox active complexes containing a periplasmic  
49 multiheme *c*-cytochrome, integral outer membrane  $\beta$ -barrel, and outer membrane redox  
50 lipoprotein. Single gene-cluster deletions and all possible multiple deletion mutant combinations  
51 were constructed and grown with graphite electrodes poised at +0.24 V and -0.1 V vs. SHE,  
52 Fe(III)- and Mn(IV)-oxides, and soluble Fe(III)-citrate. Different gene clusters were necessary for  
53 reduction of each electron acceptor. For example, only the  $\Delta extABCD$  cluster mutant had a  
54 severe growth defect on graphite electrodes at all redox potentials, but this mutation did not  
55 affect Fe(III)-oxide, Mn(IV)-oxide, or Fe(III)-citrate reduction. During metal oxide reduction,  
56 deletion of the previously described *omcBC* cluster caused defects, but deletion of additional  
57 components in the  $\Delta omcBC$  background, such as *extEFG*, was necessary to produce defects  
58 greater than 50% compared to wild type. Deletion of all five gene clusters was required to  
59 abolish all metal reduction. Mutants containing only one cluster were able to reduce particular  
60 terminal electron acceptors better than wild type, suggesting routes for improvement by  
61 targeting substrate-specific electron transfer pathways. Our results show *G. sulfurreducens*  
62 utilizes different membrane conduits depending on the extracellular acceptor used.

63

## 64 INTRODUCTION

65

66 Microorganisms capable of extracellular respiration can alter the redox state of particulate metal  
67 oxides in soils and sediments, controlling their solubility and bioavailability (Tadanier *et al.*,  
68 2005; N'Guessan *et al.*, 2008; Toner *et al.*, 2009; Williams *et al.*, 2011; Yelton *et al.*, 2013;  
69 Couture *et al.*, 2015). To respire extracellular metals, bacteria must transfer electrons from the  
70 cell interior to outer surface redox proteins, requiring unique mechanisms compared to growth  
71 with soluble electron acceptors. The requirement for surface exposed electron transfer proteins  
72 also presents opportunities for transformation of heavy metals, biological nanoparticle synthesis,  
73 and a new generation of microbially-powered electrochemical devices using bacteria grown on  
74 electrodes (Bond *et al.*, 2002; Bond and Lovley, 2003; Holmes *et al.*, 2004; Ren *et al.*, 2008;  
75 Logan and Rabaey, 2012; Schrader *et al.*, 2016; Schievano *et al.*, 2016).

76

77 An extracellular electron transfer strategy must overcome several biological and inorganic  
78 issues. In Gram negative cells, a conductive pathway capable of crossing the inner membrane,  
79 periplasm, and outer membrane must first be constructed (Gralnick and Newman, 2007; Shi *et al.*,  
80 2016). Because metal oxides vary widely in chemistry, surface charge, redox state, and  
81 surface area, an additional diversity of proteins may be needed to link cell surfaces with different  
82 terminal minerals (Navrotsky *et al.*, 2008; Majzlan, 2013; Levar *et al.*, 2017). Many metal-  
83 reducing bacteria can also transfer electrons to extracellular electrodes (Bond and Lovley, 2003;  
84 Marsili *et al.*, 2010; Snider *et al.*, 2012; Robuschi *et al.*, 2013). Unlike metal oxide particles,  
85 electrodes represent an unlimited electron acceptor where cells directly in contact with the  
86 inorganic surface can support more distant daughter cells linked by a conductive network of  
87 redox proteins that relay electrons to cells at the electrode. These biological and chemical  
88 variables raise the possibility that different electron transfer proteins may be needed to access  
89 each different kind of extracellular mineral, surface, or environment.

90

91 A model organism widely studied for its ability to reduce a diversity of metals and electrodes is  
92 the  $\delta$ -Proteobacterium *Geobacter sulfurreducens*, and recent work suggests this organism can  
93 adjust its electron transfer pathway depending on conditions. CbcL, a combination *c*- and *b*-type  
94 inner membrane cytochrome (Zacharoff *et al.*, 2016), is only required when extracellular metals  
95 and electrodes are below redox potentials of -0.1 V vs. SHE, while the inner membrane *c*-type  
96 cytochrome ImcH (Levar *et al.*, 2014), is essential when acceptors are at higher redox potentials

97 (Levar *et al.*, 2017). Beyond the outer membrane, the secreted cytochrome OmcZ is needed  
98 only during electrode growth, while the secreted cytochrome PgcA only enhances reduction of  
99 Fe(III)-oxides (Nevin *et al.*, 2009; Leang *et al.*, 2010; Tremblay *et al.*, 2011; Qian *et al.*, 2011;  
100 Smith *et al.*, 2014; Peng and Zhang, 2017). Separating the initial event of inner membrane  
101 proton motive force generation from the extracellular protein-mineral interaction lies the outer  
102 membrane, an insulating barrier which was recently found to also contain electron transfer  
103 proteins of surprising complexity (Richardson *et al.*, 2012; Liu *et al.*, 2014).

104  
105 A mechanism for electron transfer across the outer membrane is through a porin-cytochrome  
106 electron conduit, consisting of an integral outer membrane  $\beta$ -barrel proposed to anchor a  
107 periplasmic multiheme cytochrome to an outer surface lipoprotein cytochrome. By linking heme  
108 cofactors through the membrane spanning complex, electron flow is permitted (Hartshorne *et*  
109 *al.*, 2009; Richardson *et al.*, 2012). The first electron conduit described was the ~210 kDa  
110 MtrCAB complex from *S. oneidensis*, which can catalyze electron transfer across membranes to  
111 extracellular substrates when purified and placed in lipid vesicles (Wang *et al.*, 2008; Coursolle  
112 and Gralnick, 2012; White *et al.*, 2013). The *mtrCAB* gene cluster is essential for reduction of all  
113 tested soluble metals, electron shuttles, metal oxides, and electrodes by *S. oneidensis* (Baron *et*  
114 *al.*, 2009; Coursolle *et al.*, 2010; Coursolle and Gralnick, 2012). Related porin-cytochrome  
115 complexes capped with an extracellular DMSO reductase allow *Shewanella* to reduce DMSO on  
116 the cell exterior, while similar conduits support electron uptake by Fe(II)-oxidizing  
117 *Rhodopseudomonas* TIE-1 cells (Gralnick *et al.*, 2006; Jiao and Newman, 2007).

118  
119 In *G. sulfurreducens*, a gene cluster encoding the periplasmic cytochrome OmbA, putative  $\beta$ -  
120 barrel OmaB, and lipoprotein cytochrome OmcB also forms a conduit functionally similar to  
121 MtrCAB, though the two complexes lack any sequence similarity (Liu *et al.*, 2014). This '*ombB-*  
122 *omaB-omcB*' gene cluster is duplicated immediately downstream in the *G. sulfurreducens*  
123 genome as the near-identical '*ombC-omaC-omcC*', together forming the '*omcBC*' cluster.  
124 Antibiotic cassette insertions within *omcB*, as well as insertions deleting the entire '*ombB-omaB-*  
125 *omcB*' conduit decrease growth with Fe(III) as an electron acceptor, but the impact differs  
126 between reports and growth conditions (Leang *et al.*, 2003; Leang and Lovley, 2005; Liu *et al.*,  
127 2015). This variability between studies could be due to polar effects from inserted cassettes,

128 partial complementation by duplicated components, or the presence of undiscovered alternative  
129 pathways that also catalyze electron transfer across the outer membrane.

130

131 Recently, genome-wide transposon data found that insertions in *omcB* or *omcC* had no effect  
132 on *G. sulfurreducens* growth with electrodes poised at -0.1 vs. SHE, a low potential chosen to  
133 mimic the redox potential of Fe(III)-oxides (Chan *et al.*, 2017). However, transposon insertions  
134 within an unstudied four-gene cluster with porin-cytochrome signatures caused significant  
135 defects during growth on -0.1 V electrodes (Chan *et al.*, 2017). Deletion of this cluster, named  
136 *extABCD*, severely affected growth on low-potential electrodes, while  $\Delta$ *extABCD* mutants grew  
137 similar to wild type with Fe(III)-oxides. In contrast, deletion of both conduits contained in the  
138 *omcBC* cluster had little impact on low-potential electrode growth. These data suggested that  
139 the outer membrane pathway used for electron transfer could vary depending on environmental  
140 conditions, but also raised new questions; are different conduits required at higher redox  
141 potentials, during growth with mineral forms such as Mn(VI), or when metals become soluble?

142

143 At least five electron conduits may be encoded in the genome of *G. sulfurreducens*. Using new  
144 markerless deletion methods, this study constructed combinations of mutants lacking these  
145 gene clusters, to simultaneously compare growth using Fe(III)- and Mn(IV)-oxides, poised  
146 electrodes at two different redox potentials, and soluble Fe(III)-citrate as terminal electron  
147 acceptors. We found that only strains lacking *extABCD* showed a growth defect when  
148 electrodes were the electron acceptor, and this effect was similar at all redox potentials. A strain  
149 containing *extABCD* but lacking all other conduit clusters grew faster and to a higher final  
150 density on electrodes. Phenotypes were more complex during metal reduction. The largest  
151 defects were in  $\Delta$ *omcBC* strains, but deletion of the newly identified cluster *extEFG* in the  
152  $\Delta$ *omcBC* background was needed to severely inhibit Fe(III)-reduction. Deletion of all five  
153 clusters was necessary to eliminate reduction of soluble and insoluble metals tested. Strains  
154 containing only a single cluster showed preferences for reduction of different metals, such as  
155 the *extEFG*- and *extHIJKL*-only strains performing better with Mn(IV)-oxides than Fe(III)-oxides.  
156 These data provide evidence that multiple conduit clusters in the *G. sulfurreducens* genome are  
157 functional and are utilized during electron transfer in a substrate-dependent manner.

## 158 RESULTS

159

160 **Description of putative outer membrane electron conduits.** At least five gene clusters can  
161 be identified in the *G. sulfurreducens* genome encoding putative porin-cytochrome electron  
162 conduits, based on three key elements; (1) a multiheme periplasmic *c*-type cytochrome, (2) an  
163 outer membrane  $\beta$ -barrel protein, and (3) one or more outer membrane lipoproteins with redox  
164 cofactors (Fig. 1A). Two of these clusters correspond to the well-studied OmcB-based (*ombB*-  
165 *omaB-omcB*, GSU2739-2737) conduit and its near-identical duplicate OmcC-based cluster  
166 immediately downstream (*ombC-omaC-omcC*, GSU2733-2731). For clarity, and due to the fact  
167 that *omaBC* and *ombBC* are identical, these are together referred to as the “*omcBC*” cluster.

168

169 The *ext* genes comprise three new clusters, named for their putative roles in extracellular  
170 electron transfer (Chan *et al.*, 2017). The *extABCD* (GSU2645-2642) cluster encodes ExtA, a  
171 periplasmic dodecaheme *c*-cytochrome, ExtB, an outer membrane  $\beta$ -barrel with 18 trans-  
172 membrane domains, and ExtCD, two outer membrane lipoprotein *c*-cytochromes with 5 and 12  
173 heme binding sites, respectively. The second cluster, *extEFG* (GSU2726-2724), encodes ExtE,  
174 an outer membrane  $\beta$ -barrel with 21 trans-membrane domains, ExtF, an outer membrane  
175 lipoprotein pentaheme *c*-cytochrome, and ExtG, a periplasmic dodecaheme *c*-cytochrome. The  
176 final cluster, *extHIJKL* (GSU2940-2936) lacks an outer membrane *c*-cytochrome, but encodes  
177 ExtH, a rhodanese-family lipoprotein, ExtI, a 21 trans-membrane domain outer membrane  $\beta$ -  
178 barrel, ExtK, a periplasmic pentaheme *c*-cytochrome, and ExtJL, two small outer membrane  
179 lipoproteins.

180

181 A significant difference between *G. sulfurreducens* Ext clusters and the *S. oneidensis* Mtr  
182 conduits (Hartshorne *et al.*, 2009), is that the porin-cytochrome conduits in *S. oneidensis* are  
183 paralogs. The periplasmic MtrA and MtrD cytochromes share over 50% identity, are similar in  
184 size and heme content, and can cross complement (Coursolle and Gralnick, 2010). The  
185 lipoprotein outer surface cytochromes of *Shewanella* also demonstrate high sequence,  
186 functional, and structural conservation (Coursolle and Gralnick, 2010; Clarke *et al.*, 2011;  
187 Richardson *et al.*, 2012; Edwards *et al.*, 2012). In contrast, no component of the Ext or OmcBC  
188 complexes share any homology. For example, the predicted periplasmic *c*-cytochromes ExtA,

189 ExtG, ExtK, and OmaB vary in size from 25 to 72 kDa, contain 5 to 15 hemes, and share 18%-  
190 26% identity (Fig. 1B).

191  
192 To test physiological roles of these loci, single cluster mutants were first constructed, comprising  
193  $\Delta extABCD$ ,  $\Delta extEFG$ ,  $\Delta extHIJKL$ , and  $\Delta ombB-omaB-omcB-orfS-ombC-omaC-omcC$   
194 (abbreviated as the  $\Delta omcBC$  cluster) mutants. As these mutant strains lack any antibiotic  
195 cassettes, they were used as backgrounds for further deletions. Multiple cluster deletion  
196 mutants leaving only one conduit cluster on the genome are referred to by their single remaining  
197 cluster, e.g. " $extABCD^+$ " =  $\Delta extEFG \Delta extHIJKL \Delta omcBC$ , while the mutant lacking the  $extABCD$ ,  
198  $extEFG$ ,  $extHIJKL$ ,  $omcB$ -based and  $omcC$ -based clusters is referred to as " $\Delta 5$ ". These strains  
199 were tested under six different extracellular growth conditions varying in solubility, chemical  
200 composition, and redox potential.

201  
202 **Mutants lacking  $extABCD$  are defective in electrode growth at all redox potentials, while**  
203 **mutants containing only  $extABCD$  outperform wild type.** When grown with electrodes  
204 poised at high (0.24 V vs. SHE) or low (-0.1 V, (Chan *et al.*, 2017)) redox potentials, only  
205  $\Delta extABCD$  mutants showed a defect in rate and extent of growth. Mutants lacking the  $omcBC$   
206 and  $extEFG$  clusters grew similar to wild type, while  $\Delta extHIJKL$  demonstrated a lag before  
207 growing with a similar doubling time as wild type to nearly wild type final current density (Fig.  
208 2A). In all experiments,  $\Delta extABCD$  grew slower than a 20 h doubling time, or over 3-fold slower  
209 than wild type, and could only achieve 20% of wild type final current density, or  $116 \pm 33 \mu A/cm^2$   
210 vs.  $557 \pm 44 \mu A/cm^2$  ( $n \geq 5$ ).

211  
212 Mutants containing only one gene cluster ( $extABCD^+$ ,  $extEFG^+$ ,  $extHIJKL^+$ ,  $omcBC^+$ ) as well as  
213 a mutant lacking all gene clusters ( $\Delta 5$ ) were then analyzed for growth on electrodes. The  $\Delta 5$   
214 mutant grew at the low rate and extent of growth as the  $\Delta extABCD$  single mutant at both redox  
215 potentials, suggesting that none of the additional clusters were responsible for residual growth  
216 originally seen in  $\Delta extABCD$ . In contrast,  $extABCD^+$  grew faster than wild type ( $4.5 \pm 0.2$  h vs.  
217  $6.5 \pm 0.3$  h doubling time,  $n \geq 9$ ) and reached a final current density 40% higher than wild type  
218 ( $768 \pm 52 \mu A/cm^2$  vs.  $557 \pm 44 \mu A/cm^2$ ,  $n \geq 9$ ). All other multiple-deletion strains containing only



219 one cluster grew as poorly as the  $\Delta 5$  mutant, further indicating that under these conditions,  
220 *extEFG*, *extHIJKL*, and *omcBC* did not contribute to electron transfer to electrodes (Fig. 2B).

221  
222 **A 5-conduit deletion mutant expressing *extABCD* has a faster growth rate on electrodes**  
223 **than wild type.** To further investigate the specific effect of *extABCD* on electrode growth,  
224 *extABCD* was provided on a vector in the  $\Delta 5$  strain. The 3-gene *omcB* conduit cluster (*ombB*-  
225 *omaB-omcB*) was also placed in the  $\Delta 5$  strain using the same vector, and both were compared  
226 to wild type cells containing the empty vector. While the plasmid is stable for multiple  
227 generations, routine vector maintenance requires growth with kanamycin, and kanamycin carry-  
228 over into biofilm electrode experiments is reported to have deleterious effects on electrode  
229 growth (Levar *et al.*, 2014; Chan *et al.*, 2015). Thus, we re-examined growth of the empty vector  
230 strain. When selective levels of kanamycin ( $200 \mu\text{g}\cdot\text{ml}^{-1}$ ) were present in electrode reactors,  
231 colonization slowed and final current production decreased 74%. At levels resulting from carry-  
232 over during passage of cells into the electrode reactor ( $5 \mu\text{g}\cdot\text{ml}^{-1}$ ) growth rate was not affected,  
233 but final current was decreased up to 30%, suggesting interference with biofilm thickness rather  
234 than respiration (Fig. 3A). All subsequent complementation was performed in the presence of 5  
235  $\mu\text{g}\cdot\text{ml}^{-1}$  residual kanamycin and compared to these controls.

236  
237 Expressing the *omcB* conduit cluster in the  $\Delta 5$  strain failed to increase growth with electrodes as  
238 electron acceptors. These data were consistent with the lack of an effect seen in  $\Delta omcBC$   
239 deletions, as well as the poor growth of *omcBC*<sup>+</sup> mutants containing both the OmcB and OmcC  
240 clusters (Fig. 3B). However, when *extABCD* was expressed on the same vector in the  $\Delta 5$   
241 background, colonization was faster and cells reached a higher final current density compared  
242 to wild type ( $421 \pm 89 \mu\text{A}/\text{cm}^2$  vs.  $297 \pm 11 \mu\text{A}/\text{cm}^2$ ,  $n=3$ ) (Fig. 3B). This enhancement was  
243 similar to the positive effect observed in the *extABCD*<sup>+</sup> strain, and further supported the  
244 hypothesis that *extABCD* played a central role during electron transfer to electrodes (Fig. 2B).

245  
246 Growth of intermediate two-conduit deletion mutants were unchanged from single-cluster strains  
247 (Fig. S1). Just as the mutant lacking *extABCD* produced the same phenotype as the  $\Delta 5$  strain  
248 (Fig. 2), deletion of second clusters from the  $\Delta extABCD$  strain produced similar results as  
249  $\Delta extABCD$ , and no other two-cluster combination of *omcBC*, *extEFG* or *extHIJKL* mutants



250 showed defects to suggest they were utilized or expressed during these electrode growth  
251 conditions.

252

253 **Cells lacking single gene clusters have partial reduction defects with Fe(III)- and Mn(IV)-**  
254 **oxides.** In contrast to the dominant effect of *extABCD* on electrode respiration, no single cluster  
255 deletion eliminated the majority of growth with particulate Fe(III)- or Mn(IV)-oxides. The most  
256 severe defect was observed in the  $\Delta omcBC$  cluster mutant, which reduced 68% of Fe(III)-oxide  
257 compared to wild type (Fig. 4A). Minor defects were observed for  $\Delta extEFG$  and  $\Delta extHIJKL$ ,  
258 while  $\Delta extACBD$  reduced Fe(III)-oxide near wild-type levels. None of the single mutants  
259 displayed defects with Mn(IV)-oxides (Fig. 4C). These results suggested that multiple clusters  
260 were active during metal oxide reduction.

261

262 **Any one gene cluster is sufficient for partial Fe(III)- or Mn(IV)-oxide reduction, while**  
263 **deletion of all 5 clusters eliminates electron transfer to these metal oxides.** Unlike  
264 electrode respiration, deletion of the full suite of clusters eliminated all residual electron transfer  
265 to Fe(III)-and Mn(IV)-oxides (Fig. 4B and D). When multiple-deletion strains containing only one  
266 cluster were tested for Fe(III)-oxide reduction, results supported key roles for *omcBC* and  
267 *extEFG* in metal oxide reduction, and little involvement by *extABCD*. For example, Fe(III)-oxide  
268 reduction by *omcBC*<sup>+</sup> was nearly 80% of wild type, *extEFG*<sup>+</sup> was over 60%, but the *extABCD*<sup>+</sup>  
269 strain reduced less than 30% of wild type. The *omcBC*<sup>+</sup>, *extEFG*<sup>+</sup>, and *extHIJKL*<sup>+</sup> strains  
270 achieved about 80% of wild type Mn(IV)-reduction at 80 hours, but the *extABCD*<sup>+</sup> strain again  
271 displayed poor growth with Mn(IV)-oxide.

272

273 **Only strains lacking both *omcBC* and *extEFG* had a significant defect in Fe(III)- and**  
274 **Mn(IV)-oxide reduction.** Because  $\Delta omcBC$  demonstrated the largest defect in Fe(III)-oxide  
275 reduction, additional deletions in this background were tested for Fe(III) and Mn(IV)-oxide  
276 reduction (Fig. 5). Fe(III)-oxide reduction by  $\Delta omcBC \Delta extEFG$  was less than 25% of wild type,  
277 while the  $\Delta omcBC \Delta extACBD$ , and  $\Delta omcBC \Delta extHIJKL$  strains still reduced Fe(III)-oxides  
278 similar to the  $\Delta omcBC$  strain. The  $\Delta omcBC \Delta extEFG$  strain also had a severe Mn(IV)-oxide  
279 reduction defect. Unlike Fe(III)-oxide reduction, the  $\Delta omcBC \Delta extABCD$  and  $\Delta omcBC$

280  $\Delta extHIJKL$  strains had a modest Mn(IV) reduction defect, suggesting contributions of the  
281 *extABCD* and *extHIJKL* clusters in the presence of Mn(IV) compared to Fe(III).

282

283 The poor growth of the  $\Delta omcBC \Delta extEFG$  mutant on insoluble metals was surprising since this  
284 strain still contained *extHIJKL*, and the *extHIJKL*<sup>+</sup> strain reduced 50% of Fe(III)-oxide and 75%  
285 of Mn(IV)-oxide compared to wild type (Fig. 4B and D; Table 2). This suggests *extHIJKL*  
286 expression or function of its product could be negatively affecting the level or activity of other  
287 clusters.

288

### 289 **Expression of single conduit clusters partially recovers Fe(III)- and Mn(IV)-oxide**

290 **reduction.** When compared to empty-vector controls with low (5  $\mu\text{g}\cdot\text{ml}^{-1}$ ) levels of kanamycin  
291 carryover, complementation of the  $\Delta 5$  strain with single *omcB* (as *ombB-omaB-omcB*) or  
292 *extABCD* clusters resulted in partial recovery (Fig. 6), consistent with the intermediate  
293 phenotypes displayed by mutants retaining single clusters on the genome. Expression of the  
294 *omcB* cluster reestablished Fe(III)-oxide reduction, although to a level less than that seen in the  
295 *omcBC*<sup>+</sup> strain containing the full duplicated cluster (Fig. 4B). Expressing *extABCD* from a  
296 plasmid restored Fe(III)-oxide reduction in the  $\Delta 5$  strain near the low levels of the *extABCD*<sup>+</sup>  
297 strain. Reduction of Mn(IV)-oxides by *omcB* or *extABCD*-expressing strains was even lower.

298

### 299 **Only strains lacking both *omcBC* and *extABCD* had a significant defect in Fe(III)-citrate**

300 **reduction.** As with Fe(III)- and Mn(IV)-oxides, deletion of single conduit clusters in *G.*  
301 *sulfurreducens* only had modest effects on Fe(III)-citrate reduction (Fig. 7A) and additional  
302 conduit cluster deletions were needed to severely impact growth (Fig. 7B and C). The single  
303 cluster deletion strains  $\Delta omcBC$ ,  $\Delta extEFG$ , and  $\Delta extHIJKL$  still reduced ~60% of soluble Fe(III).  
304 However, in contrast to Fe(III)-oxides, the  $\Delta extABCD$  strain showed near wild-type reduction.  
305 The  $\Delta 5$  strain lacking all *omcBC* and *ext* clusters failed to reduce Fe(III)-citrate (Fig. 7B). Also  
306 unlike Fe(III)-oxide reduction, strains with only *omcBC*<sup>+</sup> or *extABCD*<sup>+</sup> clusters had near wild-type  
307 Fe(III)-citrate reduction rate, while *extEFG*<sup>+</sup> and *extHIJKL*<sup>+</sup> reduced Fe(III)-citrate to just 20% of  
308 wild type.

309

310 Since the  $\Delta omcBC \Delta extEFG$  strain showed the largest defect in Fe(III)-oxide reduction, this  
311 strain was analyzed with Fe(III)-citrate as well. However, this double cluster deletion mutant  
312 showed little difference compared to the parent  $\Delta omcBC$  strain (Fig. 7C). In contrast to Fe(III)-

313 oxides, where deletion of *extABCD* had little effect,  $\Delta omcBC \Delta extABCD$  was the only conduit  
314 deletion combination that severely affected growth with Fe(III)-citrate (Fig. 7C). Compared to  
315 growth of *extEFG*<sup>+</sup> and *extHIJKL*<sup>+</sup> (Fig. 7B), the  $\Delta omcBC \Delta extABCD$  mutant (containing both  
316 *extEFG* and *extHIJKL*) reduced Fe(III)-citrate to the same level (Fig. 7C). These data suggest  
317 that when both *extEFG* and *extHIJKL* remained in the genome in the  $\Delta omcBC \Delta extABCD$   
318 mutant, their activity was not additive. Plasmids containing either *ombB-omaB-omcB* or  
319 *extABCD* restored Fe(III)-citrate reduction in a  $\Delta 5$  strain to levels within 90% of the respective  
320 *omcBC*<sup>+</sup> and *extABCD*<sup>+</sup> strains (Fig. 7D).

321  
322 Not shown in Fig 7 is metal reduction data for intermediate deletion mutants such as  $\Delta extEFG$   
323  $\Delta extHIJKL$ . Screens performed after such double mutants were constructed revealed no  
324 changes to phenotypes that deviated from wild type or their parent single-cluster deletions. Only  
325 the intermediate strains with phenotypes, such as  $\Delta omcBC$  background strains, are shown in  
326 Fig 7.

327  
328 **Proposed role(s) for the Omc and Ext electron conduits.** Table 2 summarizes all  
329 extracellular reduction phenotypes of single cluster deletions and deletions leaving only one  
330 conduit, adjusted to wild type performance. Many of the recently described *ext* gene clusters are  
331 necessary for wild-type metal reduction, yet few are sufficient. For example, *extEFG* and  
332 *extHIJKL* were necessary for Fe(III)-citrate reduction, as strains lacking these clusters only  
333 reduced ~65% of wild type levels. But when only *extEFG* or *extHIJKL* was present, they were  
334 not sufficient to reduce Fe(III)-citrate to more than 25% of wild type levels.

335  
336 In contrast, the *omcBC* cluster or the *extABCD* cluster alone was sufficient for Fe(III)-citrate  
337 reduction, and the *extABCD* cluster alone was sufficient for electrode growth. These phenotypes  
338 could be due to electron acceptor preferences of each complex, or differential expression driven  
339 by each electron acceptor, but in either case, each gene cluster was linked to phenotypes only  
340 under specific conditions. Deletion of all five conduits resulted in complete elimination of metal  
341 reduction abilities, while activity remained when the  $\Delta 5$  strain was grown using electrodes as  
342 terminal electron acceptor. This comparison shows each gene cluster can be functional, but

343 only under particular conditions, and provides evidence for additional undiscovered pathways  
344 enabling transmembrane electron transfer.

345

## 346 **DISCUSSION**

347

348 Sequencing of the *G. sulfurreducens* genome revealed an unprecedented number of electron  
349 transfer proteins, with twice as many genes dedicated to respiratory and redox reactions as  
350 organisms with similarly-sized genomes (Methé *et al.*, 2003). Out of 111 *c*-type cytochromes, 43  
351 had no known homolog, and many were predicted to reside in the outer membrane. The large  
352 complement of outer membrane redox proteins in *G. sulfurreducens* became even more of an  
353 anomaly as the electron transfer strategy of metal-reducing *S. oneidensis* emerged, where only  
354 a single outer membrane conduit was used to reduce a multitude of substrates (Wang *et al.*,  
355 2008; Baron *et al.*, 2009; Coursolle *et al.*, 2010; Coursolle and Gralnick, 2010).

356

357 Evidence that more than one *G. sulfurreducens* outer membrane pathway exists for reduction of  
358 extracellular substrates has accumulated since the discovery of OmcB (Leang *et al.*, 2003).  
359 Deletion of *omcB* impacted Fe(III)-reduction, but had little effect on U(IV) or Mn(IV)-oxide  
360 reduction (Shelobolina *et al.*, 2007; Aklujkar *et al.*, 2013). A  $\Delta omcB$  suppressor strain evolved  
361 for improved Fe(III)-citrate growth still reduced Fe(III)-oxides poorly (Leang and Lovley, 2005).  
362 Strains lacking *omcB* grew similar to wild type with electrodes in four different studies, (Holmes  
363 *et al.*, 2006; Richter *et al.*, 2009; Nevin *et al.*, 2009; Peng and Zhang, 2017), and OmcB  
364 abundance was lowest on cells near the electrode (Stephen *et al.*, 2014). An insertional mutant  
365 lacking six secreted and outer membrane-associated cytochromes in addition to *omcB* still  
366 demonstrated some Fe(III)-oxide reduction (Ueki *et al.*, 2017). After replacing the entire *omcBC*  
367 region with an antibiotic cassette and also finding residual Fe(III)-reducing ability, Liu *et al.*  
368 (2015) speculated that other porin-cytochrome-like clusters in the genome might be active. Most  
369 recently, Tn-seq analysis of electrode-grown cells found little effect of *omcB* mutations, yet  
370 noted significant defects from insertions in cytochromes with porin-cytochrome features (Chan  
371 *et al.*, 2017). This evidence led us to study if alternative *ext*-family conduits are functional in *G.*  
372 *sulfurreducens* under different conditions.

373

374 The genetic analysis presented here confirms a role for these unstudied conduits in extracellular  
375 respiration. All mutants still containing at least one cluster retained at least partial activity

376 towards metals, and deletion of the *omcBC* region, plus all three *ext* clusters, finally was able to  
377 eliminate metal reduction. This need to delete more than one conduit cluster helps explain prior  
378 variability and rapid evolution of suppressors in  $\Delta omcB$ -only mutants. In the case of electrodes  
379 at both high and low potentials, only deletion of *extABCD* affected growth. Since residual  
380 electron transfer to electrodes was still detected after deletion of all clusters, additional  
381 mechanisms remain to be discovered. Overall, these data support the conclusion that for all  
382 tested metal and electrode acceptors, more than one conduit is functional and capable of  
383 participating in electron transfer. We found no pattern of specific gene clusters being required at  
384 particular redox potentials, suggesting that periplasmic proteins act as a 'translator' to interface  
385 the array of outer membrane complexes with the energy conserving inner membrane  
386 cytochromes ImcH and CbcL.

387

388 More difficult to resolve is whether each putative conduit is designed for interaction with specific  
389 extracellular substrates. The fact that single cluster mutants performed differently with each  
390 substrate, along with evidence that *omcB* could not complement electrode growth while  
391 *extABCD* could, supports the hypothesis of substrate specificity. Promoters more active in the  
392 presence of Fe(III) vs. Mn(IV) could create some of these phenotypes, but differential  
393 expression still suggests cells prefer to use each cluster under specific conditions. Some  
394 complexes may preferentially interact with secreted extracellular proteins who carry electrons to  
395 the final destination, and activity from a complex is masked in the absence of its partner protein.  
396 While many extracellular proteins are known to be involved in electron transfer, such as OmcS,  
397 OmcE, OmcZ, PgcA, and pili, a lack of secreted proteins encoded within *omcBC* or *ext* gene  
398 clusters argues against co-evolution of dedicated partners. The availability of strains containing  
399 only one gene cluster will enable easier purification, engineered changes in expression levels,  
400 and protein-protein interaction studies to test these hypotheses.

401

402 The genetic context of *ext* genes may aid identification of similar clusters in genomes of other  
403 organisms, and reveal clues to their intended function. None of the *ext* regions fits the *mtr* 3-  
404 gene 'porin cytochrome' operon of one small (~40 kDa) periplasmic cytochrome, a  $\beta$ -barrel, and  
405 one large (>90 kDa) lipoprotein cytochrome. For example, *extABCD* includes two small  
406 lipoprotein cytochromes, *extEFG* is part of a hydrogenase-family transcriptional unit, and  
407 *extHIJKL* contains a rhodanese-like lipoprotein instead of an extracellular cytochrome (Fig. 1).  
408 The transcriptional unit beginning with *extEFG* includes a homolog of YedY-family periplasmic

409 protein repair systems described in *E. coli* (Gennaris *et al.*, 2015), followed by a NiFe  
410 hydrogenase similar to bidirectional Hox hydrogenases used to recycle reducing equivalents in  
411 Cyanobacteria (Appel *et al.*, 2000; Coppi, 2005; Qiu *et al.*, 2010). Rhodanase-like proteins  
412 related to ExtH typically are involved in sulfur metabolism (Ravot *et al.*, 2005; Aussignargues *et*  
413 *al.*, 2012; Prat *et al.*, 2012) and an outer surface rhodanase-like protein is linked to extracellular  
414 oxidation of metal sulfides by *Acidithiobacillus ferrooxidans* (Ramírez *et al.*, 2002). Future  
415 searches for electron conduit clusters should consider the possibility of non-cytochrome  
416 components, and be aware that conduits might be part of larger complexes that could draw  
417 electrons from pools other than periplasmic cytochromes.

418  
419 Including genes from *ext* operons in searches of other genomes reveals an interesting pattern in  
420 putative conduit regions throughout Desulfuromonadales strains isolated from freshwater,  
421 saline, subsurface, and fuel cell environments (Fig. 8). In about 1/3 of cases, the entire cluster is  
422 conserved intact, such as *extABCD* in *G. anodireducens*, *G. soli*, and *G. pickeringii* (Fig. 8B).  
423 However, when differences exist, they are typically non-orthologous replacements of the outer  
424 surface lipoprotein, such as where *extABC* is followed by a new cytochrome in *G.*  
425 *metallireducens*, *Geoalkalibacter ferrihydriticus*, and *Desulfuromonas soudanensis*.  
426 Conservation of the periplasmic cytochrome coupled to replacement of the outer surface redox  
427 protein also occurs in the *omcB* and *extHIJKL* clusters (Fig 8A and D). For example, of 18  
428 *extHIJKL* regions, 10 contain a different extracellular rhodanase-like protein upstream of  
429 *extIJKL*, each with less than 40% identity to *extH*. This remarkable variability in extracellular  
430 components, compared to conservation of periplasmic redox proteins, suggests constant lateral  
431 gene transfer and selection of domains exposed to electron acceptors and the outside  
432 environment.

433  
434 The data presented here significantly expands the number of outer membrane redox proteins  
435 contributing to electron transfer in *G. sulfurreducens*, and highlights a key difference in the  
436 *Geobacter* electron transfer strategy compared to other model organisms. In general, the  
437 pattern of multiple proteins with seemingly overlapping or redundant roles is less like respiratory  
438 reductases, and more reminiscent of cellulolytic bacteria that produce numerous similar  $\beta$ -  
439 glucosidases in response to a constantly changing polysaccharide substrate (Wang *et al.*, 2008;  
440 Coursolle *et al.*, 2010; Nelson *et al.*, 2017). A need for multiple outer membrane strategies could  
441 be a response to the complexity of metal oxides during reduction; minerals rapidly diversify to



442 become multiphase assemblages of more crystalline phases, the cell:metal interface can  
443 become enriched in Fe(II), and organic materials can bind to alter the surface (Cutting *et al.*,  
444 2009; Coker *et al.*, 2012; Eusterhues *et al.*, 2014). Expressing a complex array of electron  
445 transfer pathways makes cells competitive at all stages with all electron acceptors, allowing  
446 *Geobacter* to outgrow more specialized organisms during perturbations in the environment.

447

448

449

## 450 **EXPERIMENTAL PROCEDURES**

451

### 452 *Growth conditions.*

453 All experiments were performed with our laboratory strain of *Geobacter sulfurreducens* PCA  
454 freshly streaked single colonies from freezer stocks. Anaerobic NB media (0.38 g/L KCl, 0.2 g/L  
455 NH<sub>4</sub>Cl, 0.069 g/L NaH<sub>2</sub>PO<sub>4</sub>H<sub>2</sub>O, 0.04 g/L CaCl<sub>2</sub>2H<sub>2</sub>O, 0.2 g/L MgSO<sub>4</sub>7H<sub>2</sub>O, 1% v/v trace mineral  
456 mix, pH 6.8, buffered with 2 g/L NaHCO<sub>3</sub> and flushed with 20:80 N<sub>2</sub>:CO<sub>2</sub> gas mix) with 20 mM  
457 acetate as electron donor, 40 mM fumarate as electron acceptor was used to grow liquid  
458 cultures from colony picks. For metal reduction assays, 20 mM acetate was added with either  
459 55 mM Fe(III) citrate, ~20 mM birnessite (Mn(IV)-oxide), or ~70 mM Fe(III)-oxide freshly  
460 precipitated from FeCl<sub>2</sub> by addition of NaOH and incubation at pH 7 for 1 h before washing in DI  
461 water. All experiments were carried out at 30°C.

462

### 463 *Deletion and complementation construction*

464 Putative conduits were identified through a genomic search for gene clusters containing loci  
465 predicted to encode a  $\beta$ -barrel using PRED-TMBB (Bagos *et al.*, 2004), contiguous to  
466 periplasmic and extracellular multiheme *c*-cytochromes or other redox proteins. Localization  
467 was predicted by comparing PSORT (Yu *et al.*, 2010) and the presence/absence of lipid  
468 attachment sites (Juncker *et al.*, 2003). Constructs to delete each gene cluster were designed to  
469 recombine to leave the site marker-free and also non-polar when located in larger transcriptional  
470 units, with most primers and plasmids for the single deletions described in Chan *et al.*, 2017.  
471 When genes were part of a larger transcriptional unit or contained an upstream promoter, it was  
472 left intact. For example, in the case of the *omcBC* cluster the transcriptional regulator *orfR*



473 (GSU2741) was left intact, and in *extEFG* the promoter and untranslated region was left intact  
474 so as to not disrupt the downstream loci.

475

476 For deletion mutant construction, the suicide vector pK18*mobsacB* (Simon *et al.*, 1983) with  
477 ~750 bp flanking to the target region was used to induce homologous recombination as  
478 previously described (Chan *et al.*, 2015). Briefly, two rounds of homologous recombination were  
479 selected for. The first selection used kanamycin resistance to select for mutants with the  
480 plasmid inserted into either up or downstream regions, and the second selection used sucrose  
481 sensitivity to select for mutants that recombine the plasmid out of the chromosome, resulting in  
482 either wild type or complete deletion mutants. Deletion mutants were identified using a  
483 kanamycin sensitivity test and verified by PCR amplification targeting the region. Multiple PCR  
484 amplifications with primers in different regions were used to confirm full deletion of each gene  
485 cluster (Chan *et al.*, 2017 and Table S1).

486

487 During this work, we found that manipulations in the *omcBC* cluster, which contains large  
488 regions containing 100% identical sequences, frequently underwent recombination into  
489 unexpected hybrid mutants which could escape routine PCR verification. For example, when the  
490 *omaB* and *omaC* genes recombined, a large hybrid operon containing *omaB*-linked to *ombC*-  
491 *omcC* would result. Routine primer screening, especially targeting flanking regions, failed to  
492 detect the large product. Only via multiple internal primers (Chan *et al.*, 2017 and Table S1), as  
493 well as longer-read or single molecule sequencing, were we able to verify and isolate strains in  
494 which complete loss of the *omcBC* cluster occurred, and dispose of hybrid mutants. Whole-  
495 genome resequencing was also performed on strains containing only one cluster, such as the  
496 strain containing only *extABCD*, especially since this strain has an unexpected phenotype  
497 where it produced more current than wild type. Thorough verification by PCR and whole  
498 genome sequencing are recommended to confirm deletions of large and repetitive regions such  
499 as the *omcBC* cluster.

500

501 Mutants lacking a single gene region were used as parent strains to build additional mutations.  
502 In this manner, six double gene-cluster deletion mutants, four triple-cluster deletion mutants and  
503 one quintuple-cluster deletion mutant lacking up to nineteen genes were constructed (Fig. 1;  
504 Table 1). For complementation strains, putative conduits were amplified using primers listed in  
505 Table S1 and inserted into the *G. sulfurreducens* expression vector pRK2-Geo2 (Chan *et al.*,

506 2015), which contains a constitutive promoter  $P_{acpP}$ . The putative conduit *extABCD* was  
507 assembled into a single transcriptional unit to ensure expression.

508

#### 509 *Electrode reduction assays*

510 Sterile three-electrode conical reactors containing 15 mL of NB with 40 mM acetate as electron  
511 donor and 50mM NaCl to equilibrate salt concentration were flushed with a mix of  $N_2$ - $CO_2$  gas  
512 (80:20, v/v) until the  $O_2$  concentration reached less than 2 ppm. Liquid cultures were prepared  
513 by inoculating 1 ml liquid cultures from single colonies inside an anaerobic chamber. Once  
514 these cultures reached late exponential to stationary phase, they were used to inoculate 10 ml  
515 cultures with 10% v/v. Each reactor was then inoculated with 25% v/v from this liquid culture as  
516 it approached acceptor limitation, at an  $OD_{600}$  between 0.48 and 0.52. Working electrodes were  
517 set at either -0.1 V or +0.24 V vs SHE and average current density recorded every 12 seconds.  
518 Each liquid culture propagated from an individual colony pick served no more than two reactors,  
519 and at least three separate colonies were picked for all electrode reduction experiments for a  
520 final  $n \geq 3$ .

521

#### 522 *Metal reduction assays*

523 NB medium with 20 mM acetate as electron donor and either 55 mM Fe(III)-citrate, ~70 mM  
524 Fe(III) oxide, or ~20 mM birnessite ( $Mn(IV)O_2$ ) as electron acceptor was inoculated with a 0.1%  
525 inoculum of early stationary phase fumarate limited cultures. Time points were taken as  
526 necessary with anaerobic and sterile needles. These were diluted 1:10 into 0.5 N HCl for the  
527 Fe(III) samples and into 2 N HCl, 4mM  $FeSO_4$  for Mn(IV) samples. Samples were diluted once  
528 more by 1:10 in the case of Fe(III) assays and by 1:5 in the case of Mn(IV) assays into 0.5 N  
529 HCl. Ferrozine<sup>R</sup> reagent was then used to determine the Fe(II) concentration in each sample.  
530 Original Fe(II) concentrations were calculated for Fe(III) reduction assays by accounting for  
531 dilutions and original Mn(IV) concentrations were calculated by accounting for the concentration  
532 of Fe(II) oxidized by Mn(IV) based on the following:  $Mn(IV) + 2Fe(II) = Mn(II) + 2Fe(III)$ .

533

#### 534 *Homolog search and alignment*

535 Homologs to each of the individual cytochrome conduit proteins were queried on 11-30-2016 in  
536 the Integrated Microbial Genomes database (Markowitz *et al.*, 2012) with a cutoff on 75%  
537 sequence length and 40% identity based on amino acid sequence within the  
538 Desulfuromonadales. A higher percent identity was demanded in this search due to the high

539 heme binding site density with the invariable CXXCH sequence. Only ExtJ and ExtL were  
540 excluded from the search and the OmcBC region was collapsed into a single cluster due to the  
541 high identity shared between the two copies. The gene neighborhood around each homolog hit  
542 was analyzed. With a few exceptions (see Table S2), all homologs were found to be conserved  
543 in gene clusters predicted to encode cytochrome conduits and containing several additional  
544 homologs to each corresponding *G. sulfurreducens* conduit. The proteins within each  
545 homologous cytochrome conduit that did not fall within the set cutoff were aligned to the amino  
546 acid sequence of the *G. sulfurreducens* component they replaced using ClustalΩ (Sievers *et al.*,  
547 2011).

548 **ACKNOWLEDGEMENTS**

549 This research was supported by the Office of Naval Research (N000141210308). FJO is  
550 supported by the National Council of Science and Technology of Mexico (CONACYT).

551

552 **AUTHOR CONTRIBUTIONS**

553 FJO was responsible for the design of the study and the acquisition of data. Both FJO and DRB  
554 were responsible for the analysis and interpretation of the data; as well as writing of the  
555 manuscript.

556

557 **ABBREVIATED SUMMARY**

558 *Geobacter sulfurreducens* cells utilize electron conduits, or chains of redox proteins spanning  
559 the outer membrane, to transfer electrons to extracellular acceptors. Five different gene clusters  
560 encoding putative electron conduits were deleted in single- and multiple-gene-cluster  
561 markerless deletion strains. Mutants containing single conduit gene clusters each showed  
562 specific abilities to reduce Fe(III)- and Mn(IV)-oxides, Fe(III)-citrate and poised electrodes, and  
563 multiple conduits appeared to have overlapping roles during metal reduction. ExtABCD was the  
564 only electron conduit involved in electrode reduction.

565

566 **REFERENCES**

- 567 Aklujkar, M., Coppi, M.V., Leang, C., Kim, B.C., Chavan, M.A., Perpetua, L.A., *et al.* (2013)  
568 Proteins involved in electron transfer to Fe(III) and Mn(IV) oxides by *Geobacter sulfurreducens*  
569 and *Geobacter uraniireducens*. *Microbiology* **159**: 515–535.
- 570 Appel, J., Phunpruch, S., Steinmüller, K., and Schulz, R. (2000) The bidirectional hydrogenase  
571 of *Synechocystis* sp. PCC 6803 works as an electron valve during photosynthesis. *Arch*  
572 *Microbiol* **173**: 333–338.
- 573 Aussignargues, C., Giuliani, M.-C., Infossi, P., Lojou, E., Guiral, M., Giudici-Orticoni, M.-T., and  
574 Ilbert, M. (2012) Rhodanese functions as sulfur supplier for key enzymes in sulfur energy  
575 metabolism. *J Biol Chem* **287**: 19936–19948.
- 576 Bagos, P.G., Liakopoulos, T.D., Spyropoulos, I.C., and Hamodrakas, S.J. (2004) PRED-TMBB:  
577 a web server for predicting the topology of  $\beta$ -barrel outer membrane proteins. *Nucleic Acids Res*  
578 **32**: W400–W404.
- 579 Baron, D., LaBelle, E., Coursolle, D., Gralnick, J.A., and Bond, D.R. (2009) Electrochemical  
580 measurement of electron transfer kinetics by *Shewanella oneidensis* MR-1. *J Biol Chem* **284**:  
581 28865–28873.
- 582 Bond, D.R., Holmes, D.E., Tender, L.M., and Lovley, D.R. (2002) Electrode-reducing  
583 microorganisms that harvest energy from marine sediments. *Science* **295**: 483–485.
- 584 Bond, D.R., and Lovley, D.R. (2003) Electricity production by *Geobacter sulfurreducens*  
585 attached to electrodes. *Appl Environ Microbiol* **69**: 1548–1555.
- 586 Chan, C.H., Levar, C.E., Otero, F.J., and Bond, D.R. (2017) Genome scale mutational analysis  
587 of *Geobacter sulfurreducens* reveals distinct molecular mechanisms for respiration and sensing  
588 of poised electrodes vs. Fe(III) oxides. *J Bacteriol* doi: 10.1128/JB.00340-17.
- 589 Chan, C.H., Levar, C.E., Zacharoff, L., Badalamenti, J.P., and Bond, D.R. (2015) Scarless  
590 genome editing and stable inducible expression vectors for *Geobacter sulfurreducens*. *Appl*  
591 *Environ Microbiol* **81**: 7178–7186.
- 592 Clarke, T.A., Edwards, M.J., Gates, A.J., Hall, A., White, G.F., Bradley, J., *et al.* (2011)  
593 Structure of a bacterial cell surface decaheme electron conduit. *Proc Natl Acad Sci* **108**: 9384–  
594 9389.
- 595 Coker, V.S., Byrne, J.M., Telling, N.D., Van Der Laan, G., Lloyd, J.R., Hitchcock, A.P., *et al.*  
596 (2012) Characterisation of the dissimilatory reduction of Fe(III)-oxyhydroxide at the microbe –  
597 mineral interface: the application of STXM–XMCD. *Geobiology* **10**: 347–354.
- 598 Coppi, M.V. (2005) The hydrogenases of *Geobacter sulfurreducens*: a comparative genomic  
599 perspective. *Microbiology* **151**: 1239–1254.
- 600 Coursolle, D., Baron, D.B., Bond, D.R., and Gralnick, J.A. (2010) The Mtr respiratory pathway is  
601 essential for reducing flavins and electrodes in *Shewanella oneidensis*. *J Bacteriol* **192**: 467–  
602 474.

- 603 Coursolle, D., and Gralnick, J.A. (2010) Modularity of the Mtr respiratory pathway of *Shewanella*  
604 *oneidensis* strain MR-1. *Mol Microbiol* **77**: 995–1008.
- 605 Coursolle, D., and Gralnick, J.A. (2012) Reconstruction of extracellular respiratory pathways for  
606 iron(III) reduction in *Shewanella oneidensis* strain MR-1. *Front Microbiol* **3**:56
- 607 Couture, R.-M., Charlet, L., Markelova, E., Madé, B., and Parsons, C.T. (2015) On–off  
608 mobilization of contaminants in soils during redox oscillations. *Environ Sci Technol* **49**: 3015–  
609 3023.
- 610 Cutting, R.S., Coker, V.S., Fellowes, J.W., Lloyd, J.R., and Vaughan, D.J. (2009) Mineralogical  
611 and morphological constraints on the reduction of Fe(III) minerals by *Geobacter sulfurreducens*.  
612 *Geochim Cosmochim Acta* **73**: 4004–4022.
- 613 Edwards, M.J., Hall, A., Shi, L., Fredrickson, J.K., Zachara, J.M., Butt, J.N., *et al.* (2012) The  
614 crystal structure of the extracellular 11-heme cytochrome UndA reveals a conserved 10-heme  
615 motif and defined binding site for soluble iron chelates. *Structure* **20**: 1275–1284.
- 616 Eusterhues, K., Hädrich, A., Neidhardt, J., Küsel, K., Keller, T.F., Jandt, K.D., and Totsche, K.U.  
617 (2014) Reduction of ferrihydrite with adsorbed and coprecipitated organic matter: microbial  
618 reduction by *Geobacter bremerensis* vs. abiotic reduction by Na-dithionite. *Biogeosciences* **11**:  
619 4953–4966.
- 620 Gennaris, A., Ezraty, B., Henry, C., Agrebi, R., Vergnes, A., Oheix, E., *et al.* (2015) Repairing  
621 oxidized proteins in the bacterial envelope using respiratory chain electrons. *Nature* **528**: 409–  
622 412.
- 623 Gralnick, J.A., and Newman, D.K. (2007) Extracellular respiration. *Mol Microbiol* **65**: 1–11.
- 624 Gralnick, J.A., Vali, H., Lies, D.P., and Newman, D.K. (2006) Extracellular respiration of  
625 dimethyl sulfoxide by *Shewanella oneidensis* strain MR-1. *Proc Natl Acad Sci U S A* **103**: 4669–  
626 4674.
- 627 Hartshorne, R.S., Reardon, C.L., Ross, D., Nuester, J., Clarke, T.A., Gates, A.J., *et al.* (2009)  
628 Characterization of an electron conduit between bacteria and the extracellular environment.  
629 *Proc Natl Acad Sci* **106**: 22169–22174.
- 630 Holmes, D.E., Bond, D.R., O’Neil, R.A., Reimers, C.E., Tender, L.R., and Lovley, D.R. (2004)  
631 Microbial communities associated with electrodes harvesting electricity from a variety of aquatic  
632 sediments. *Microb Ecol* **48**: 178–190.
- 633 Holmes, D.E., Chaudhuri, S.K., Nevin, K.P., Mehta, T., Methé, B.A., Liu, A., *et al.* (2006)  
634 Microarray and genetic analysis of electron transfer to electrodes in *Geobacter sulfurreducens*.  
635 *Environ Microbiol* **8**: 1805–1815.
- 636 Jiao, Y., and Newman, D.K. (2007) The *pio* operon is essential for phototrophic Fe(II) oxidation  
637 in *Rhodospseudomonas palustris* TIE-1. *J Bacteriol* **189**: 1765–1773.

- 638 Juncker, A.S., Willenbrock, H., Heijne, G. von, Brunak, S., Nielsen, H., and Krogh, A. (2003)  
639 Prediction of lipoprotein signal peptides in Gram-negative bacteria. *Protein Sci Publ Protein Soc*  
640 **12**: 1652–1662.
- 641 Leang, C., Coppi, M.V., and Lovley, D.R. (2003) OmcB, a *c*-type polyheme cytochrome,  
642 involved in Fe(III) reduction in *Geobacter sulfurreducens*. *J Bacteriol* **185**: 2096–2103.
- 643 Leang, C., and Lovley, D.R. (2005) Regulation of two highly similar genes, *omcB* and *omcC*, in  
644 a 10 kb chromosomal duplication in *Geobacter sulfurreducens*. *Microbiology* **151**: 1761–1767.
- 645 Leang, C., Qian, X., Mester, T., and Lovley, D.R. (2010) Alignment of the *c*-type cytochrome  
646 OmcS along pili of *Geobacter sulfurreducens*. *Appl Environ Microbiol* **76**: 4080–4084.
- 647 Levar, C.E., Chan, C.H., Mehta-Kolte, M.G., and Bond, D.R. (2014) An inner membrane  
648 cytochrome required only for reduction of high redox potential extracellular electron acceptors.  
649 *mBio* **5**: e02034-14.
- 650 Levar, C.E., Hoffman, C.L., Dunshee, A.J., Toner, B.M., and Bond, D.R. (2017) Redox potential  
651 as a master variable controlling pathways of metal reduction by *Geobacter sulfurreducens*.  
652 *ISME J* **11**: 741-752.
- 653 Liu, Y., Fredrickson, J.K., Zachara, J.M., and Shi, L. (2015) Direct involvement of *ombB*, *omaB*,  
654 and *omcB* genes in extracellular reduction of Fe(III) by *Geobacter sulfurreducens* PCA.  
655 *Microbiol Chem Geomicrobiol* 1075.
- 656 Liu, Y., Wang, Z., Liu, J., Levar, C., Edwards, M.J., Babauta, J.T., *et al.* (2014) A trans-outer  
657 membrane porin-cytochrome protein complex for extracellular electron transfer by *Geobacter*  
658 *sulfurreducens* PCA. *Environ Microbiol Rep* **6**: 776–785.
- 659 Logan, B.E., and Rabaey, K. (2012) Conversion of wastes into bioelectricity and chemicals by  
660 using microbial electrochemical technologies. *Science* **337**: 686–690.
- 661 Majzlan, J. (2013) Minerals and aqueous species of iron and manganese as reactants and  
662 products of microbial metal respiration. In *Microbial Metal Respiration*. Gescher, J., and Kappler,  
663 A. (eds). Springer Berlin Heidelberg, pp. 1–28
- 664 Markowitz, V.M., Chen, I.-M.A., Palaniappan, K., Chu, K., Szeto, E., Grechkin, Y., *et al.* (2012)  
665 IMG: the integrated microbial genomes database and comparative analysis system. *Nucleic*  
666 *Acids Res* **40**: D115–D122.
- 667 Marsili, E., Sun, J., and Bond, D.R. (2010) Voltammetry and growth physiology of *Geobacter*  
668 *sulfurreducens* biofilms as a function of growth stage and imposed electrode potential.  
669 *Electroanalysis* **22**: 865–874.
- 670 Methé, B.A., Nelson, K.E., Eisen, J.A., Paulsen, I.T., Nelson, W., Heidelberg, J.F., *et al.* (2003)  
671 Genome of *Geobacter sulfurreducens*: Metal reduction in subsurface environments. *Science*  
672 **302**: 1967–1969.
- 673 Navrotsky, A., Mazeina, L., and Majzlan, J. (2008) Size-driven structural and thermodynamic  
674 complexity in iron oxides. *Science* **319**: 1635–1638.



- 675 Nelson, C.E., Rogowski, A., Morland, C., Wilhide, J.A., Gilbert, H.J., and Gardner, J.G. (2017)  
676 Systems analysis in *Cellvibrio japonicus* resolves predicted redundancy of  $\beta$ -glucosidases and  
677 determines essential physiological functions. *Mol Microbiol* **104**;2 294.
- 678 Nevin, K.P., Kim, B.-C., Glaven, R.H., Johnson, J.P., Woodard, T.L., Methé, B.A., *et al.* (2009)  
679 Anode biofilm transcriptomics reveals outer surface components essential for high density  
680 current production in *Geobacter sulfurreducens* fuel cells. *PLOS ONE* **4**: e5628.
- 681 N'Guessan, A.L., Vrionis, H.A., Resch, C.T., Long, P.E., and Lovley, D.R. (2008) Sustained  
682 removal of uranium from contaminated groundwater following stimulation of dissimilatory metal  
683 reduction. *Environ Sci Technol* **42**: 2999–3004.
- 684 Peng, L., and Zhang, Y. (2017) Cytochrome OmcZ is essential for the current generation by  
685 *Geobacter sulfurreducens* under low electrode potential. *Electrochimica Acta* **228**: 447–452.
- 686 Prat, L., Maillard, J., Rohrbach-Brandt, E., and Holliger, C. (2012) An unusual tandem-domain  
687 rhodanese harbouring two active sites identified in *Desulfitobacterium hafniense*. *FEBS J* **279**:  
688 2754–2767.
- 689 Qian, X., Mester, T., Morgado, L., Arakawa, T., Sharma, M.L., Inoue, K., *et al.* (2011)  
690 Biochemical characterization of purified OmcS, a *c*-type cytochrome required for insoluble  
691 Fe(III) reduction in *Geobacter sulfurreducens*. *Biochim Biophys Acta BBA - Bioenerg* **1807**:  
692 404–412.
- 693 Qiu, Y., Cho, B.-K., Park, Y.S., Lovley, D., Palsson, B.Ø., and Zengler, K. (2010) Structural and  
694 operational complexity of the *Geobacter sulfurreducens* genome. *Genome Res* **20**: 1304–1311.
- 695 Ramírez, P., Toledo, H., Guigliani, N., and Jerez, C.A. (2002) An exported rhodanese-like protein  
696 is induced during growth of *Acidithiobacillus ferrooxidans* in metal sulfides and different sulfur  
697 compounds. *Appl Environ Microbiol* **68**: 1837–1845.
- 698 Ravot, G., Casalot, L., Ollivier, B., Loison, G., and Magot, M. (2005) *rdIA*, a new gene encoding  
699 a rhodanese-like protein in *Halanaerobium congolense* and other thiosulfate-reducing  
700 anaerobes. *Res Microbiol* **156**: 1031–1038.
- 701 Ren, Z., Steinberg, L.M., and Regan, J.M. (2008) Electricity production and microbial biofilm  
702 characterization in cellulose-fed microbial fuel cells. *Water Sci Technol* **58**: 617–622.
- 703 Richardson, D.J., Butt, J.N., Fredrickson, J.K., Zachara, J.M., Shi, L., Edwards, M.J., *et al.*  
704 (2012) The “porin–cytochrome” model for microbe-to-mineral electron transfer. *Mol Microbiol* **85**:  
705 201–212.
- 706 Richter, H., P. Nevin, K., Jia, H., A. Lowy, D., R. Lovley, D., and M. Tender, L. (2009) Cyclic  
707 voltammetry of biofilms of wild type and mutant *Geobacter sulfurreducens* on fuel cell anodes  
708 indicates possible roles of OmcB, OmcZ, type IV pili, and protons in extracellular electron  
709 transfer. *Energy Environ Sci* **2**: 506–516.
- 710 Robuschi, L., Tomba, J.P., Schrott, G.D., Bonanni, P.S., Desimone, P.M., and Busalmen, J.P.  
711 (2013) Spectroscopic slicing to reveal internal redox gradients in electricity-producing biofilms.  
712 *Angew Chem Int Ed* **52**: 925–928.

- 713 Schievano, A., Pepé Sciarria, T., Vanbroekhoven, K., De Wever, H., Puig, S., Andersen, S.J., *et*  
714 *al.* (2016) Electro-fermentation – Merging electrochemistry with fermentation in industrial  
715 applications. *Trends Biotechnol* **34**:11 866-878.
- 716 Schrader, P.S., Reimers, C.E., Girguis, P., Delaney, J., Doolan, C., Wolf, M., and Green, D.  
717 (2016) Independent benthic microbial fuel cells powering sensors and acoustic communications  
718 with the MARS underwater observatory. *J Atmospheric Ocean Technol* **33**: 607–617.
- 719 Shelobolina, E.S., Coppi, M.V., Korenevsky, A.A., DiDonato, L.N., Sullivan, S.A., Konishi, H., *et*  
720 *al.* (2007) Importance of *c*-type cytochromes for U(VI) reduction by *Geobacter sulfurreducens*.  
721 *BMC Microbiol* **7**: 16.
- 722 Shi, L., Dong, H., Reguera, G., Beyenal, H., Lu, A., Liu, J., *et al.* (2016) Extracellular electron  
723 transfer mechanisms between microorganisms and minerals. *Nat Rev Microbiol* **14**: 651–662.
- 724 Sievers, F., Wilm, A., Dineen, D., Gibson, T.J., Karplus, K., Li, W., *et al.* (2011) Fast, scalable  
725 generation of high-quality protein multiple sequence alignments using Clustal Omega. *Mol Syst*  
726 *Biol Mol Syst Biol* **7**, **7**: 539, 539–539.
- 727 Simon, R., Priefer, U., and Pühler, A. (1983) A broad host range mobilization system for in vivo  
728 genetic engineering: Transposon mutagenesis in Gram negative bacteria. *Nat Biotechnol* **1**:  
729 784–791.
- 730 Smith, J.A., Tremblay, P.-L., Shrestha, P.M., Snoeyenbos-West, O.L., Franks, A.E., Nevin, K.P.,  
731 and Lovley, D.R. (2014) Going wireless: Fe(III) oxide reduction without pili by *Geobacter*  
732 *sulfurreducens* strain JS-1. *Appl Environ Microbiol* **80**: 4331–4340.
- 733 Snider, R.M., Strycharz-Glaven, S.M., Tsoi, S.D., Erickson, J.S., and Tender, L.M. (2012) Long-  
734 range electron transport in *Geobacter sulfurreducens* biofilms is redox gradient-driven. *Proc Natl*  
735 *Acad Sci* **109**: 15467–15472.
- 736 Stephen, C.S., LaBelle, E.V., Brantley, S.L., and Bond, D.R. (2014) Abundance of the  
737 multiheme *c*-type cytochrome OmcB increases in outer biofilm layers of electrode-grown  
738 *Geobacter sulfurreducens*. *PLOS ONE* **9**: e104336.
- 739 Tadanier, C.J., Schreiber, M.E., and Roller, J.W. (2005) Arsenic mobilization through microbially  
740 mediated deflocculation of ferrihydrite. *Environ Sci Technol* **39**: 3061–3068.
- 741 Toner, B.M., Fakra, S.C., Manganini, S.J., Santelli, C.M., Marcus, M.A., Moffett, J.W., *et al.*  
742 (2009) Preservation of iron(II) by carbon-rich matrices in a hydrothermal plume. *Nat Geosci* **2**:  
743 197–201.
- 744 Tremblay, P.-L., Summers, Z.M., Glaven, R.H., Nevin, K.P., Zengler, K., Barrett, C.L., *et al.*  
745 (2011) A *c*-type cytochrome and a transcriptional regulator responsible for enhanced  
746 extracellular electron transfer in *Geobacter sulfurreducens* revealed by adaptive evolution.  
747 *Environ Microbiol* **13**: 13–23.
- 748 Ueki, T., DiDonato, L.N., and Lovley, D.R. (2017) Toward establishing minimum requirements  
749 for extracellular electron transfer in *Geobacter sulfurreducens*. *FEMS Microbiol Lett* **364**:9

- 750 Wang, Z., Liu, C., Wang, X., Marshall, M.J., Zachara, J.M., Rosso, K.M., *et al.* (2008) Kinetics of  
751 reduction of Fe(III) complexes by outer membrane cytochromes MtrC and OmcA of *Shewanella*  
752 *oneidensis* MR-1. *Appl Environ Microbiol* **74**: 6746–6755.
- 753 White, G.F., Shi, Z., Shi, L., Wang, Z., Dohnalkova, A.C., Marshall, M.J., *et al.* (2013) Rapid  
754 electron exchange between surface-exposed bacterial cytochromes and Fe(III) minerals. *Proc*  
755 *Natl Acad Sci* **110**: 6346–6351.
- 756 Williams, K.H., Long, P.E., Davis, J.A., Wilkins, M.J., N’Guessan, A.L., Steefel, C.I., *et al.* (2011)  
757 Acetate availability and its influence on sustainable bioremediation of uranium-contaminated  
758 groundwater. *Geomicrobiol J* **28**: 519–539.
- 759 Yelton, A.P., Williams, K.H., Fournelle, J., Wrighton, K.C., Handley, K.M., and Banfield, J.F.  
760 (2013) Vanadate and acetate biostimulation of contaminated sediments decreases diversity,  
761 selects for specific taxa, and decreases aqueous V<sup>5+</sup> concentration. *Environ Sci Technol* **47**:  
762 6500–6509.
- 763 Yu, N.Y., Wagner, J.R., Laird, M.R., Melli, G., Rey, S., Lo, R., *et al.* (2010) PSORTb 3.0:  
764 improved protein subcellular localization prediction with refined localization subcategories and  
765 predictive capabilities for all prokaryotes. *Bioinformatics* **26**: 1608–1615.
- 766 Zacharoff, L., Chan, C.H., and Bond, D.R. (2016) Reduction of low potential electron acceptors  
767 requires the CbcL inner membrane cytochrome of *Geobacter sulfurreducens*.  
768 *Bioelectrochemistry* **107**: 7–13.
- 769
- 770

771 **Tables:**

772

773 **Table 1**

| Strains and Plasmids                    | Description or relevant genotype                                                                  | Reference                  |
|-----------------------------------------|---------------------------------------------------------------------------------------------------|----------------------------|
| <i>Geobacter sulfurreducens</i> strains |                                                                                                   |                            |
| DB1279                                  | $\Delta$ GGSU2731-39 ( $\Delta$ <i>omcBC</i> )                                                    | Chan <i>et al.</i> , 2017  |
| DB1280                                  | $\Delta$ GGSU2645-42 ( $\Delta$ <i>extABCD</i> )                                                  | Chan <i>et al.</i> , 2017  |
| DB1281                                  | $\Delta$ GGSU2940-36 ( $\Delta$ <i>extHIJKL</i> )                                                 | Chan <i>et al.</i> , 2017  |
| DB1282                                  | $\Delta$ GGSU2724-26 ( $\Delta$ <i>extEFG</i> )                                                   | Chan <i>et al.</i> , 2017  |
| DB1487                                  | $\Delta$ GGSU2731-39 $\Delta$ GGSU2645-42 ( $\Delta$ <i>omcBC</i> $\Delta$ <i>extABCD</i> )       | This study                 |
| DB1488                                  | $\Delta$ GGSU2731-39 $\Delta$ GGSU2724-26 ( $\Delta$ <i>omcBC</i> $\Delta$ <i>extEFG</i> )        | This study                 |
| DB1289                                  | $\Delta$ GGSU2731-39 $\Delta$ GGSU2940-36 ( $\Delta$ <i>omcBC</i> $\Delta$ <i>extHIJKL</i> )      | This study                 |
| DB1489                                  | $\Delta$ GGSU2645-42 $\Delta$ GGSU2724-26 ( $\Delta$ <i>extABCD</i> $\Delta$ <i>extEFG</i> )      | This study                 |
| DB1490                                  | $\Delta$ GGSU2645-42 $\Delta$ GGSU2940-36 ( $\Delta$ <i>extABCD</i> $\Delta$ <i>extHIJKL</i> )    | This study                 |
| DB1290                                  | $\Delta$ GGSU2731-39 $\Delta$ GGSU2940-36 $\Delta$ GGSU2724-26 ( <i>extA</i> <sup>+</sup> )       | This study                 |
| DB1291                                  | $\Delta$ GGSU2731-39 $\Delta$ GGSU2645-42 $\Delta$ GGSU2936-2940 ( <i>extEFG</i> <sup>+</sup> )   | This study                 |
| DB1491                                  | $\Delta$ GGSU2731-39 $\Delta$ GGSU2645-42 $\Delta$ GGSU2726-24 ( <i>extHIJKL</i> <sup>+</sup> )   | This study                 |
| DB1492                                  | $\Delta$ GGSU2645-42 $\Delta$ GGSU2726-24 $\Delta$ 2940-36 ( <i>omcBC</i> <sup>+</sup> )          | This study                 |
| DB1493                                  | $\Delta$ GGSU2731-39 $\Delta$ GGSU2645-42 $\Delta$ GGSU2726-24 $\Delta$ GGSU2940-36 ( $\Delta$ 5) | This study                 |
| <i>Escherichia coli</i> strains         |                                                                                                   |                            |
| S17-1                                   | <i>recA pro hsdR</i> RP4-2-Tc::Mu-Km::Tn7                                                         | Simon <i>et al.</i> , 1983 |
| Plasmids                                |                                                                                                   |                            |
| pK18 <i>mobsacB</i>                     |                                                                                                   | Simon <i>et al.</i> , 1983 |
| pRK2-Geo2                               |                                                                                                   | Chan <i>et al.</i> , 2015  |
| p <i>DomcBC</i>                         | Flanking regions of <i>omcBC</i> in pK18 <i>mobsacB</i>                                           | This study                 |
| p <i>DextABCD</i>                       | Flanking regions of <i>extABCD</i> in pK18 <i>mobsacB</i>                                         | This study                 |
| p <i>DextEFG</i>                        | Flanking regions of <i>extEFG</i> in pK18 <i>mobsacB</i>                                          | This study                 |
| p <i>DextHIJKL</i>                      | Flanking regions of <i>extHIJKL</i> in pK18 <i>mobsacB</i>                                        | This study                 |
| p <i>omcB</i>                           | <i>ombB-omaB-omcB</i> in pRK2-Geo2                                                                | This study                 |
| p <i>extABCD</i>                        | <i>extABCD</i> in pRK2-Geo2                                                                       | This study                 |

774

775

776

777 **Table 1. Strains and plasmids used in this study.**

778

779

780

781

782 **Table 2**

783

784

| Substrate       | % of wild type |                  |                 |                   |           |             |            |              | $\Delta 5$ |
|-----------------|----------------|------------------|-----------------|-------------------|-----------|-------------|------------|--------------|------------|
|                 | $\Delta omcBC$ | $\Delta extABCD$ | $\Delta extEFG$ | $\Delta extHIJKL$ | $omcBC^+$ | $extABCD^+$ | $extEFG^+$ | $extHIJKL^+$ |            |
| Fe(III)-citrate | 61.2           | 105              | 62.5            | 66.3              | 101.1     | 99.2        | 22.5       | 23.8         | 0.1        |
| Fe(III)-oxide   | 68.9           | 83.3             | 87.5            | 95.8              | 78.8      | 29.2        | 60.4       | 52.1         | 0.1        |
| Mn(IV)-oxide    | 94.5           | 95.1             | 99.6            | 97.9              | 83.3      | 26.7        | 86.8       | 75.6         | 1.7        |
| Electrode       | 76.5           | 20.9             | 104.8           | 86.3              | 28.3      | 137.9       | 21.2       | 25.9         | 21.9       |

785

786

787

788 **Table 2. Performance of *G. sulfurreducens* strains lacking one cluster, or containing only**

789 **one cluster.** Growth of single cytochrome conduit deletion mutants and mutants lacking all

790 except one cytochrome conduit, averaged from all incubations and represented as the percent

791 of wild type growth. Averages calculated from  $n \geq 8$  experiments.

792

793 **Figure Legends**

794

795 **Figure 1. The outer membrane electron conduit gene clusters of *G. sulfurreducens*.** A)  
796 Genetic organization and predicted features of operons containing putative outer membrane  
797 conduits. Deletion constructs indicated by dashed line. B) Identity matrix from amino acid  
798 sequence alignment of each cytochrome or  $\beta$ -barrel component using Clustal $\Omega$ .

799

800 **Figure 2. Only ExtABCD conduit is involved in electrode reduction.** Current density  
801 produced by A) single and B) multiple-cluster deletion mutants on graphite electrodes poised at  
802 +0.24 V vs. SHE. All mutants were grown in at least two separate experiments, and curves are  
803 representative of  $n \geq 3$  independent replicates. Similar results were obtained at lower (-0.1 V vs.  
804 SHE) redox potentials.

805

806 **Figure 3. Effect of kanamycin on final current density, and comparison of ExtABCD and**  
807 **OmcBC complementation.** A) Final current density of wild type *G. sulfurreducens* compared to  
808 wild type carrying an empty vector in the presence of increasing kanamycin concentrations. B)  
809 Current density produced by  $\Delta 5$  strain plus either *extABCD* or *omcB* cluster-containing vectors,  
810 in the presence of 5  $\mu\text{g/ml}$  residual kanamycin. Wild type and  $\Delta 5$  strains carrying the empty  
811 vector were used as controls. All experiments were conducted in duplicate and curves are  
812 representative of  $n \geq 3$  replicates.

813

814 **Figure 4. No single outer membrane cluster is essential but all are functional for electron**  
815 **transfer to Fe(III)- and Mn(IV)-oxides.** Growth of single cluster deletion mutants and triple  
816 mutants lacking all but one cytochrome conduit, as well as  $\Delta 5$  mutant lacking all clusters  
817 utilizing A) 70 mM Fe(III)-oxide or B) 20 mM Mn(IV)-oxide as terminal electron acceptor. All  
818 experiments were conducted in triplicate and curves are average  $\pm$  SD of  $n \geq 3$  replicates.

819

820 **Figure 5. OmcBC and ExtEFG have dominant roles in Fe(III) and Mn(IV) oxide reduction.**  
821 Reduction of A) 70 mM Fe(III)-oxide or B) 20 mM Mn(IV)-oxide by the  $\Delta omcBC$  strain and  
822 additional deletions in an  $\Delta omcBC$  background. All experiments were conducted in triplicate and  
823 curves are average  $\pm$  SD of  $n \geq 3$  replicates.

824

825 **Figure 6. Co-presence of multiple conduit complexes is responsible for wild-type levels**  
826 **of metal oxide reduction.** Reduction of A) 70 mM Fe(III)-oxide or B) 20 mM Mn(IV)-oxide by  
827 the  $\Delta 5$  mutant expressing *extABCD* or the *omcB* cluster compared to the empty vector control.  
828 All experiments were conducted in triplicate and curves are average  $\pm$  SD of  $n \geq 3$  replicates.

829

830 **Figure 7. OmcBC and ExtABCD are the key cytochromes during Fe(III)-citrate reduction.**  
831 Growth using 55 mM Fe(III)-citrate as an electron acceptor by A) single conduit cluster deletion

832 mutants, B) triple mutants lacking all but one cytochrome conduit, as well as the  $\Delta 5$  strain  
833 lacking all five cytochrome conduits, C) mutants in an  $\Delta omcBC$  background strain, and D)  $\Delta 5$   
834 mutants expressing *omcB* or *extABCD* or carrying an empty expression vector as control. All  
835 experiments were conducted in triplicate and curves are average  $\pm$  SD of  $n \geq 3$  replicates.

836

837 **Figure 8. Cytochrome conduit conservation across the Order Desulfuromonadales.**

838 Schematic representation of cytochrome conduits from the Desulfuromonadales with homologs  
839 to either A) *OmcBC*, B) *ExtABCD*, C) *ExtEFG*, or D) *ExtHIJKL*. Red arrows = putative outer  
840 membrane products with a predicted lipid attachment site, yellow arrows = predicted periplasmic  
841 components, and green arrows = predicted outer membrane anchor components. Complete  
842 clusters with all components sharing  $>40\%$  identity to the corresponding *G. sulfurreducens*  
843 cytochrome conduit are represented in boxes to the left of each gene cluster. Clusters in which  
844 one or more proteins are replaced by a new element with  $<40\%$  identity are listed on the right  
845 side of each gene cluster. Proteins with numbers indicate the % identity to the *G. sulfurreducens*  
846 version. <sup>a</sup>*OmcBC* homologs in these gene clusters also encoding Hox hydrogenase complexes.  
847 <sup>b</sup>Gene clusters have contiguous *extBCD* loci but *extA* is not in near vicinity, as *extA* were found  
848 un-clustered in separate parts of the genome for some of those organisms (see Supplemental  
849 Table S2). <sup>c</sup>Gene cluster has additional lipoprotein decaheme *c*-cytochrome upstream of *extE*.  
850 <sup>d</sup>Lipid attachment sites corresponding to *ExtJL* could not be found but there is an additional  
851 small lipoprotein encoded within the gene cluster. For *ExtHIJKL* encoding clusters, homologs  
852 depicted above *extH* are found in gene clusters containing only *extI*, whereas homologs  
853 depicted below *extH* are found in gene clusters containing full *extHIJKL* loci. Upstream and on  
854 the opposite strand to all gene clusters homologous to *extHIJKL* there is a transcription  
855 regulator of the LysR family, except <sup>e</sup>, where there is no transcriptional regulator in that region,  
856 and <sup>f</sup>, where there are transcriptional regulators of the TetR family instead.

857



Figure 1.

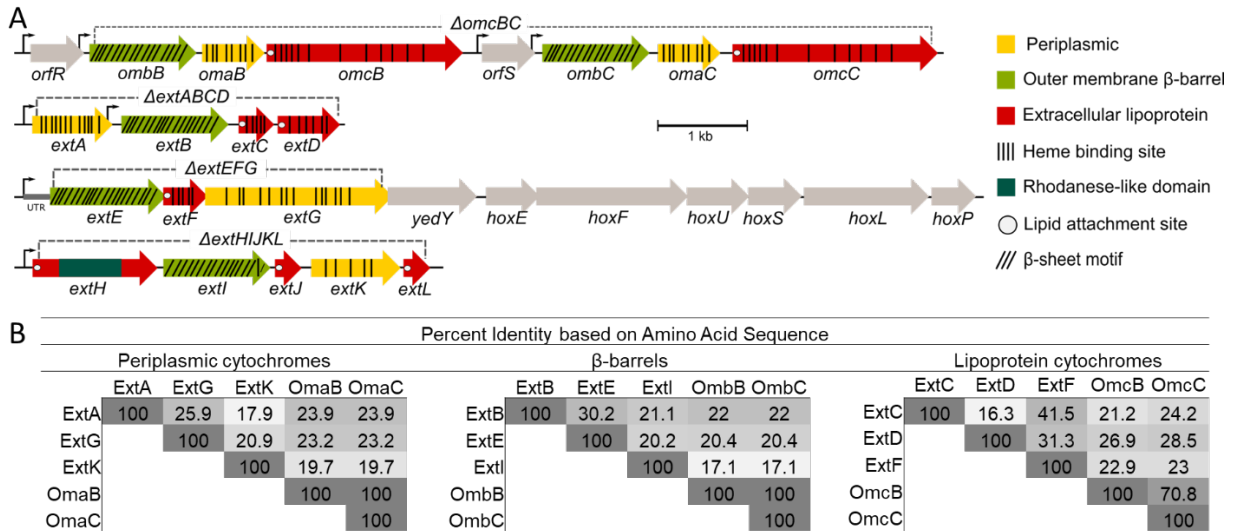

**Figure 1. The outer membrane electron conduit gene clusters of *G. sulfurreducens*.** A) Genetic organization and predicted features of operons containing putative outer membrane conduits. Deletion constructs indicated by dashed line. B) Identity matrix from amino acid sequence alignment of each cytochrome or β-barrel component using ClustalΩ.

Figure 2.

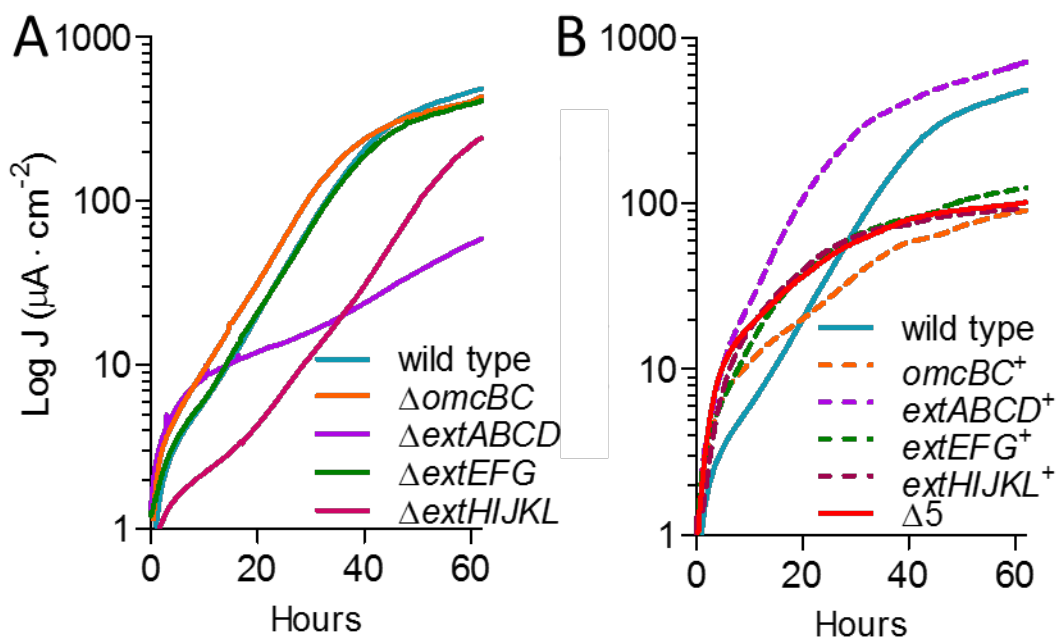

**Figure 2. Only ExtABCD conduit is involved in electrode reduction.** Current density produced by A) single and B) multiple-cluster deletion mutants on graphite electrodes poised at +0.24 V vs. SHE. All mutants were grown in at least two separate experiments, and curves are representative of  $n \geq 3$  independent replicates. Similar results were obtained at lower (-0.1 V vs. SHE) redox potentials.

Figure 3.

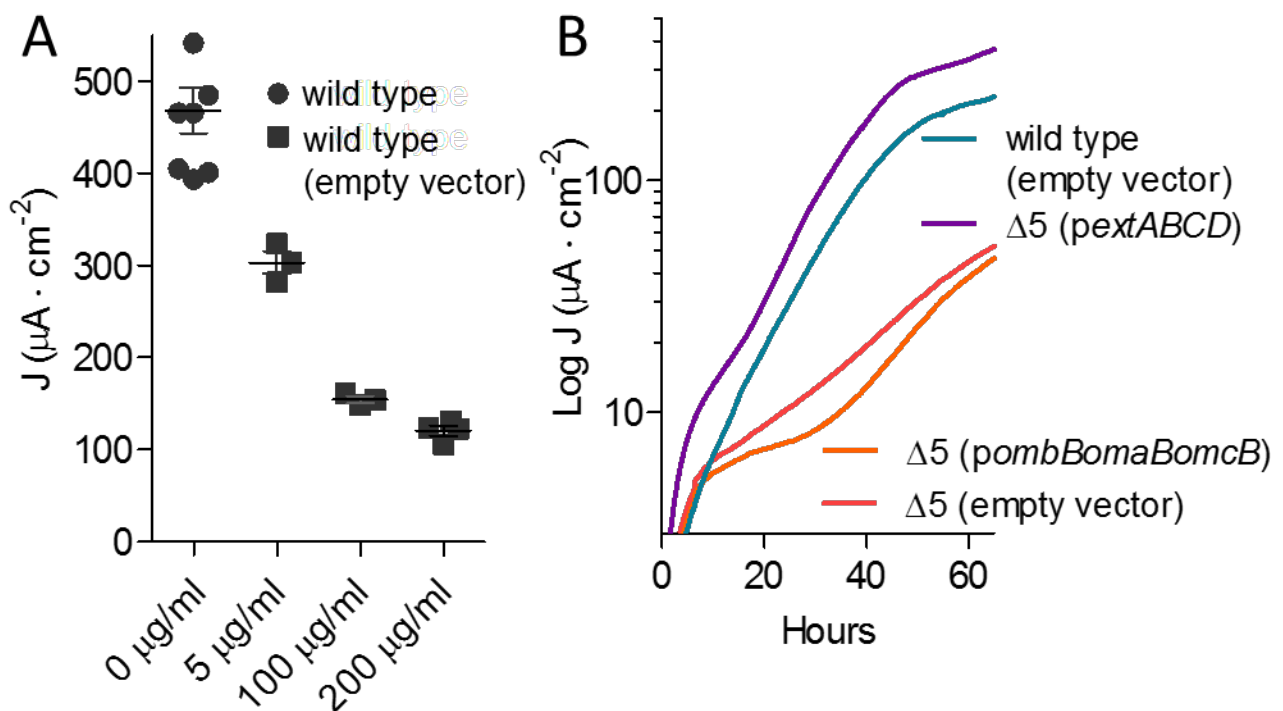

**Figure 3. Effect of kanamycin on final current density, and comparison of ExtABCD and OmcBC complementation.** A) Final current density of wild type *G. sulfurreducens* compared to wild type carrying an empty vector in the presence of increasing kanamycin concentrations. B) Current density produced by  $\Delta 5$  strain plus either *extABCD* or *omcB* cluster-containing vectors, in the presence of 5  $\mu\text{g/ml}$  residual kanamycin. Wild type and  $\Delta 5$  strains carrying the empty vector were used as controls. All experiments were conducted in duplicate and curves are representative of  $n \geq 3$  replicates.

Figure 4.

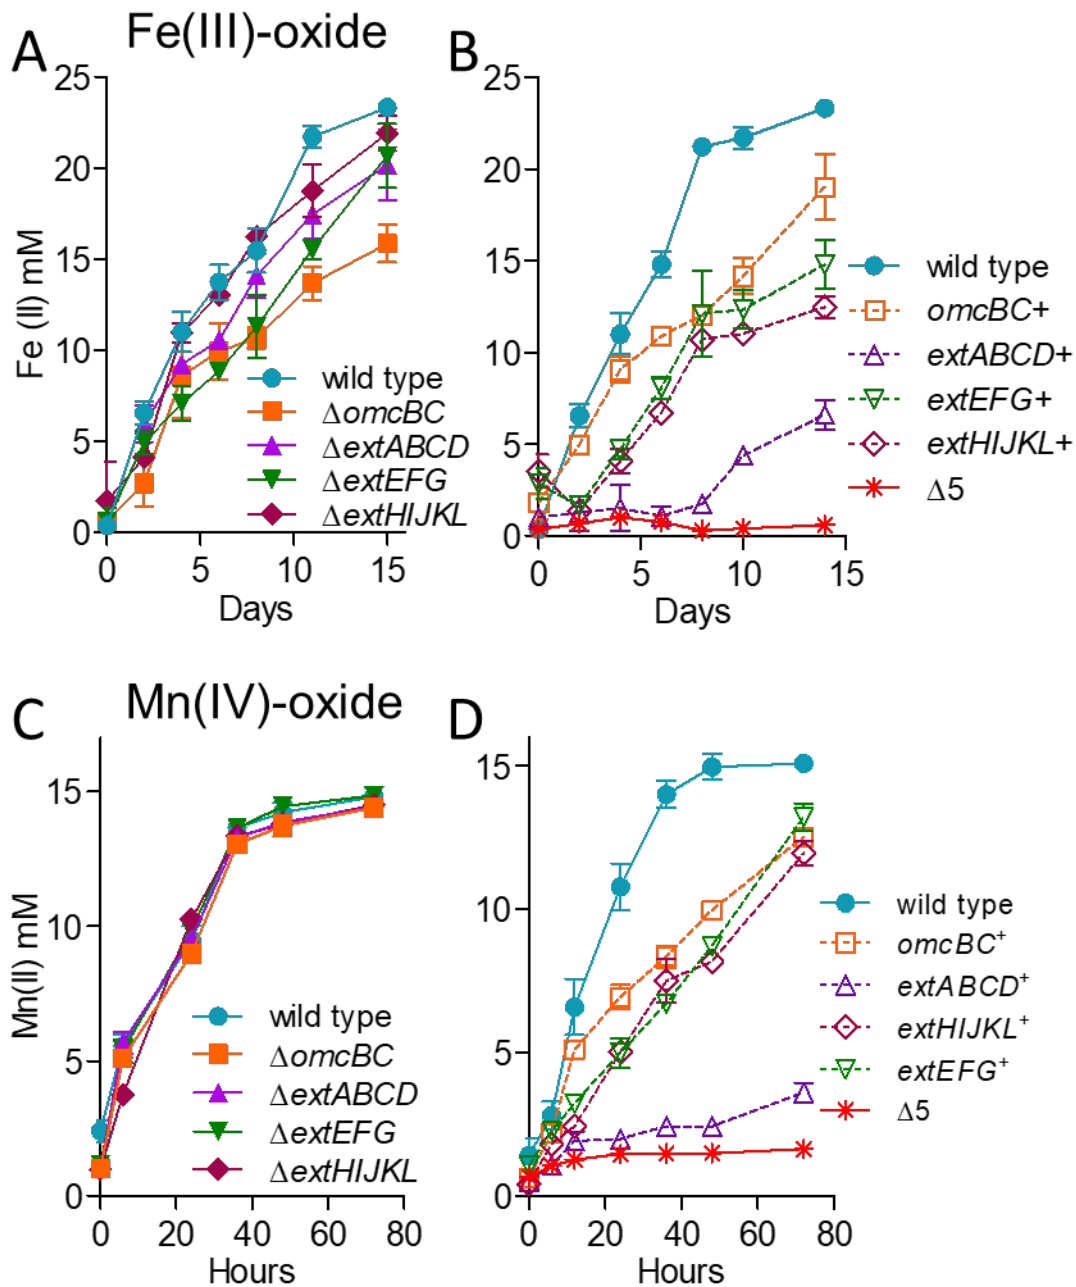

**Figure 4. No single outer membrane cluster is essential but all are functional for electron transfer to Fe(III)- and Mn(IV)-oxides.** Growth of single cluster deletion mutants and triple mutants lacking all but one cytochrome conduit, as well as  $\Delta 5$  mutant lacking all clusters utilizing A) 70 mM Fe(III)-oxide or B) 20 mM Mn(IV)-oxide as terminal electron acceptor. All experiments were conducted in triplicate and curves are average  $\pm$  SD of  $n \geq 3$  replicates.

Figure 5.

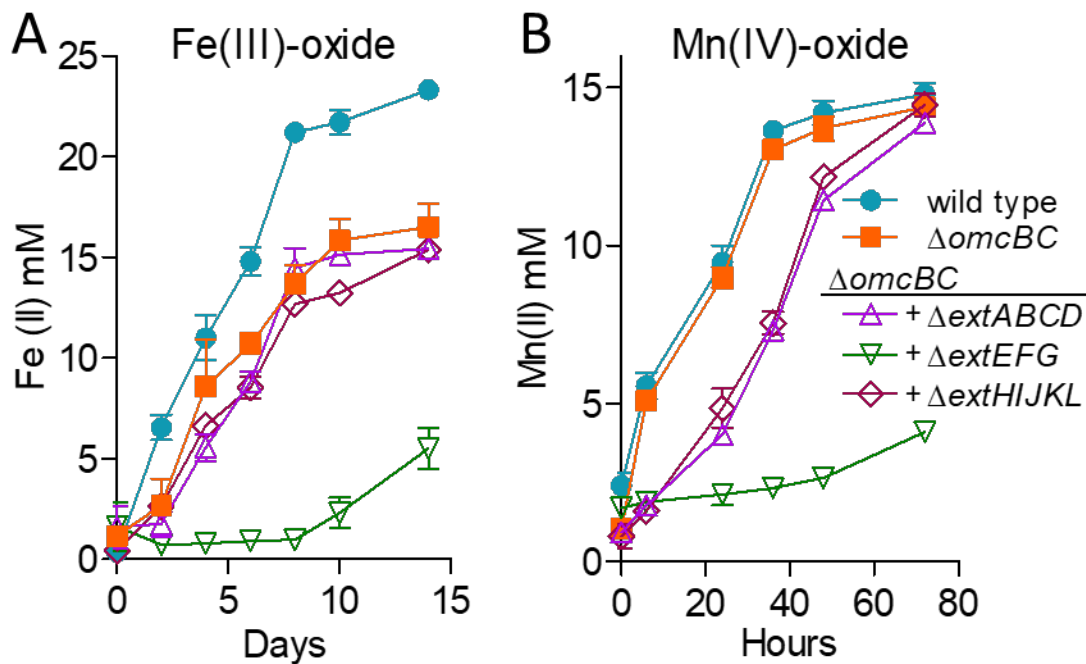

**Figure 5. OmcBC and ExtEFG have dominant roles in Fe(III) and Mn(IV) oxide reduction.**

Reduction of A) 70 mM Fe(III)-oxide or B) 20 mM Mn(IV)-oxide by the  $\Delta omcBC$  strain and additional deletions in an  $\Delta omcBC$  background. All experiments were conducted in triplicate and curves are average  $\pm$  SD of  $n \geq 3$  replicates.

Figure 6.

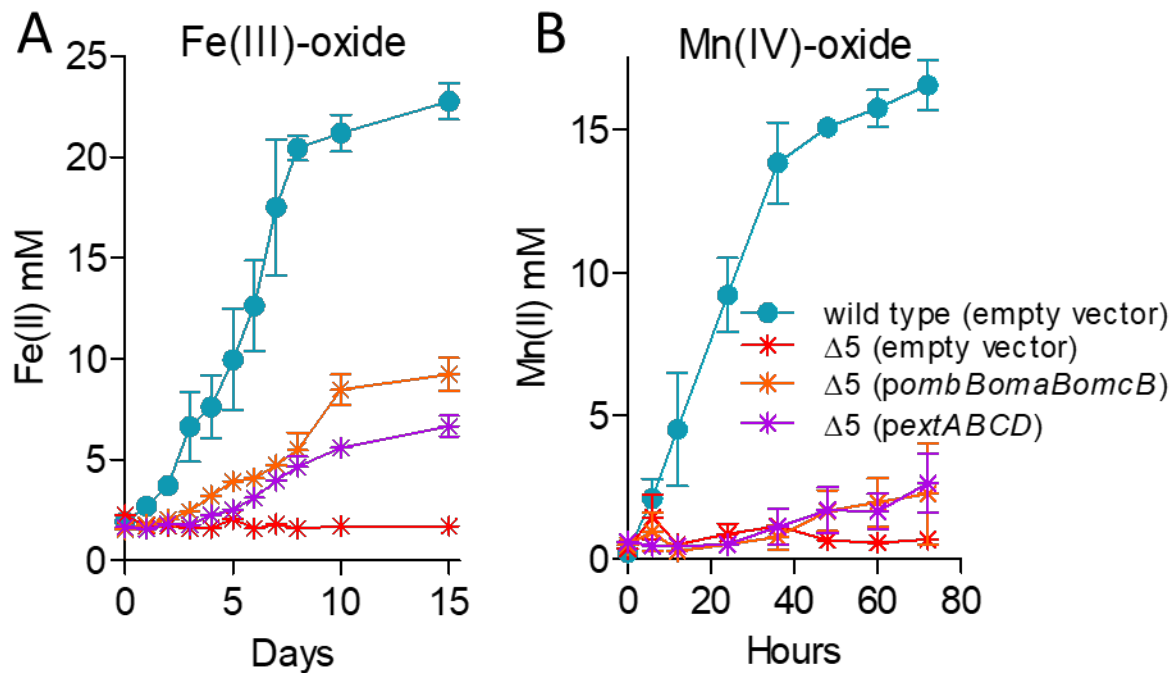

**Figure 6. Co-presence of multiple conduit complexes is responsible for wild-type levels of metal oxide reduction.** Reduction of A) 70 mM Fe(III)-oxide or B) 20 mM Mn(IV)-oxide by the  $\Delta 5$  mutant expressing *extABCD* or the *omcB* cluster compared to the empty vector control. All experiments were conducted in triplicate and curves are average  $\pm$  SD of  $n \geq 3$  replicates.

Figure 7.

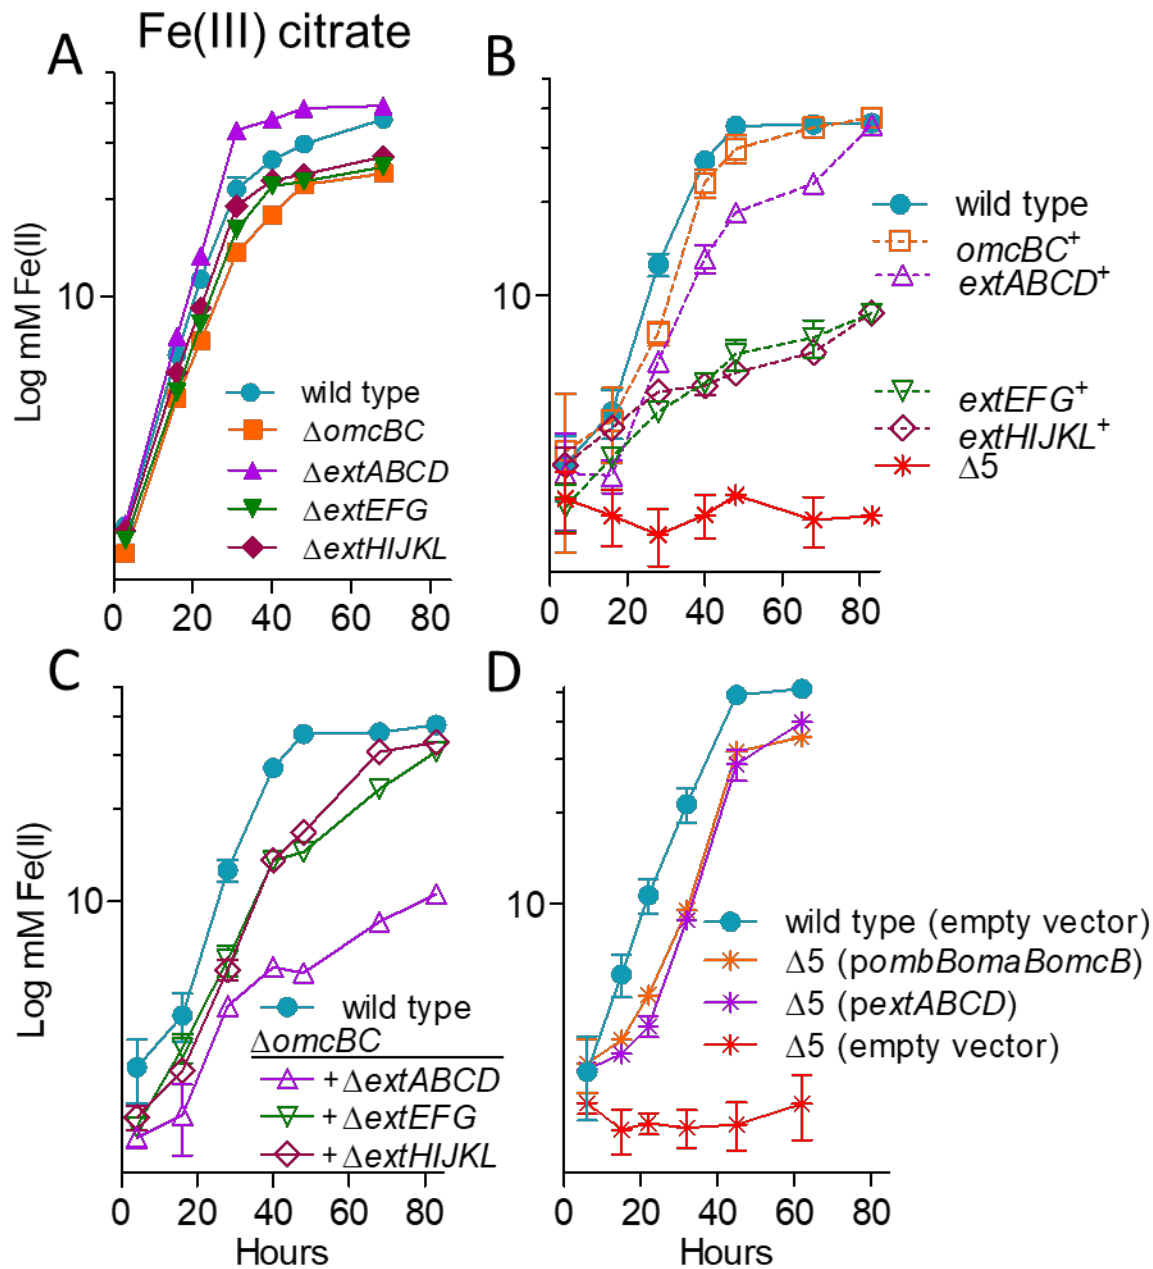

**Figure 7. OmcBC and ExtABCD are the key cytochromes during Fe(III)-citrate reduction.** Growth using 55 mM Fe(III)-citrate as an electron acceptor by A) single conduit cluster deletion mutants, B) triple mutants lacking all but one cytochrome conduit, as well as the  $\Delta 5$  strain lacking all five cytochrome conduits, C) mutants in an  $\Delta omcBC$  background strain, and D)  $\Delta 5$  mutants expressing *omcB* or *extABCD* or carrying an empty expression vector as control. All experiments were conducted in triplicate and curves are average  $\pm$  SD of  $n \geq 3$  replicates.



Figure 8.

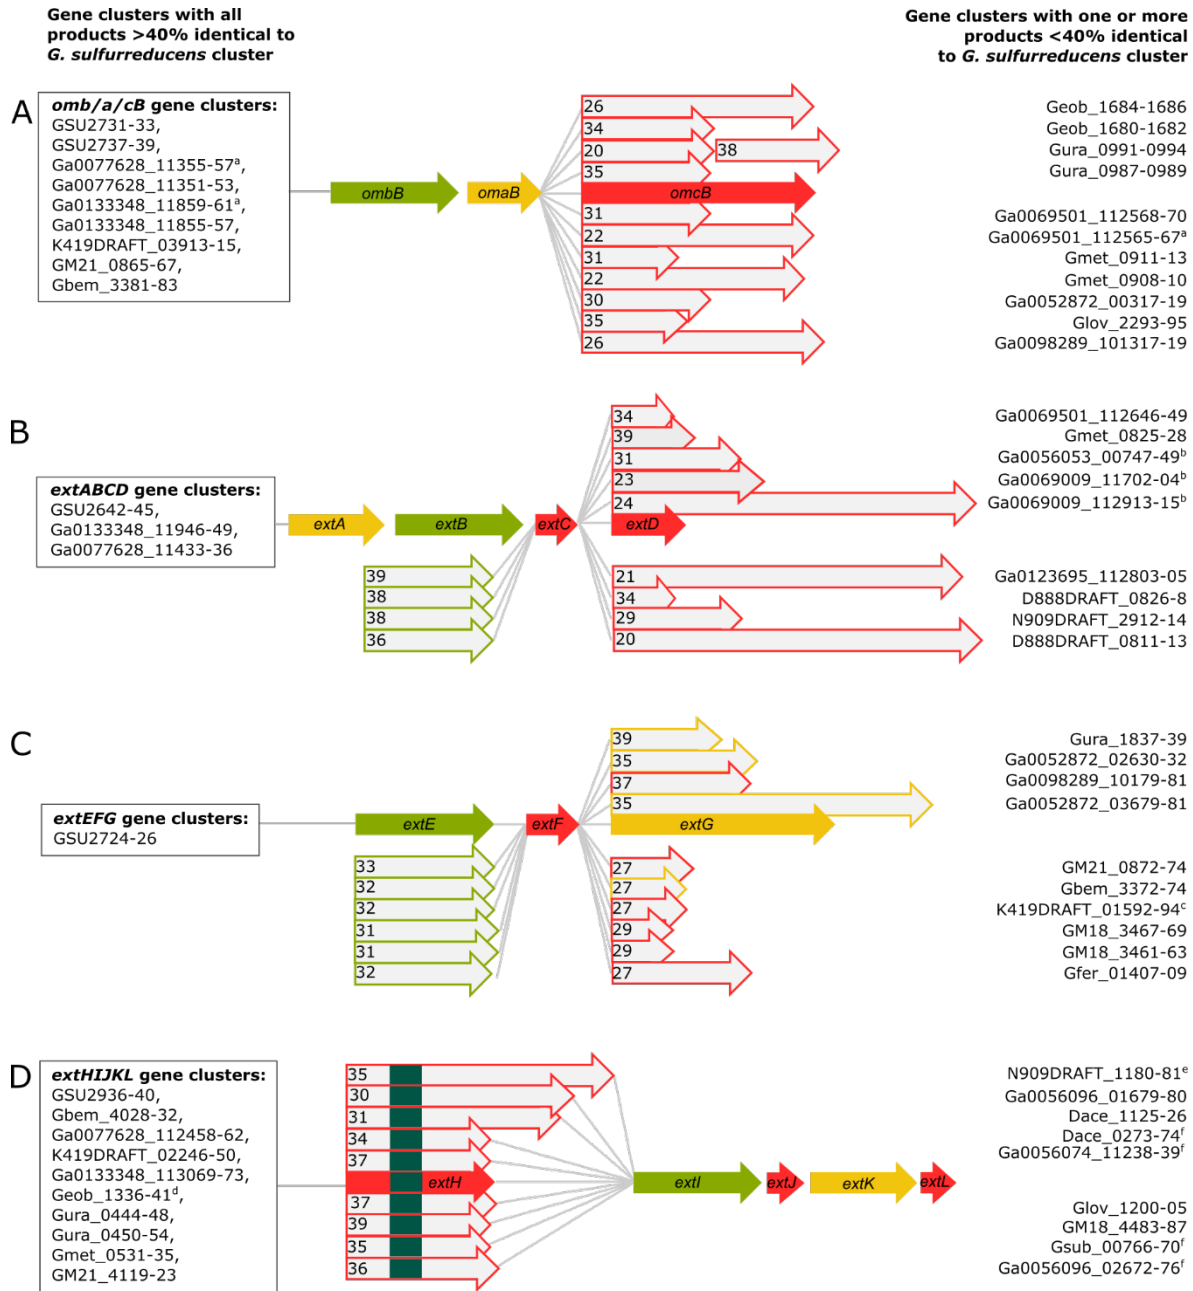

**Figure 8. Cytochrome conduit conservation across the Order Desulfuromonadales.**

Schematic representation of cytochrome conduits from the Desulfuromonadales with homologs to either A) OmcBC, B) ExtABCD, C) ExtEFG, or D) ExtHIJKL. Red arrows = putative outer membrane products with a predicted lipid attachment site, yellow arrows = predicted periplasmic components, and green arrows = predicted outer membrane anchor components. Complete clusters with all components sharing >40% identity to the corresponding *G. sulfurreducens* cytochrome conduit are represented in boxes to the left of each gene cluster. Clusters in which

one or more proteins are replaced by a new element with <40% identity are listed on the right side of each gene cluster. Proteins with numbers indicate the % identity to the *G. sulfurreducens* version. <sup>a</sup>OmcBC homologs in these gene clusters also encoding Hox hydrogenase complexes. <sup>b</sup>Gene clusters have contiguous *extBCD* loci but *extA* is not in near vicinity, as *extA* were found un-clustered in separate parts of the genome for some of those organisms (see Supplemental Table S2). <sup>c</sup>Gene cluster has additional lipoprotein decaheme *c*-cytochrome upstream of *extE*. <sup>d</sup>Lipid attachment sites corresponding to ExtJL could not be found but there is an additional small lipoprotein encoded within the gene cluster. For ExtHIJKL encoding clusters, homologs depicted above *extH* are found in gene clusters containing only *extI*, whereas homologs depicted below *extH* are found in gene clusters containing full *extHIJKL* loci. Upstream and on the opposite strand to all gene clusters homologous to *extHIJKL* there is a transcription regulator of the LysR family, except <sup>e</sup>, where there is no transcriptional regulator in that region, and <sup>f</sup>, where there are transcriptional regulators of the TetR family instead.
